## 33 **Abstract**

34

35 The Philippine archipelago was believed to have never been connected to the Asian continent  
36 even during the severe Quaternary sea-level drops. As a result, the history of pig dispersal in  
37 the Philippines remains controversial and must have some anthropogenic origin associated with  
38 some human migration events. In this study, the context of origin, dispersal, and the level of  
39 genetic introgression in Philippine native pigs were deduced using mitochondrial DNA D-loop  
40 analysis altogether with domestic pigs and wild boars corresponding to their geographic origin.  
41 Results revealed a considerable genetic diversity ( $0.900\pm 0.016$ ), and a widespread Asian pig-  
42 ancestry (94.60%) were revealed in the phylogenetic analysis with admixed European pig-  
43 origin (5.10%) harboring various fractions of ancestry from Berkshire and Landrace. The close  
44 genetic connection between the continental wild boars and domestic pigs present in the  
45 Philippine pigs corroborates our hypothesis of a genetic signal that could potentially be  
46 associated with the recently reported multiple waves of human migrations to the Philippines  
47 during the last 50,000 years. The high frequency of haplotypes (54.08%) that collapsed in the  
48 D7 haplogroup represent an interesting challenge as its distribution does not coincide with the  
49 hypothesized migratory route of the Neolithic Austronesian-speaking populations. We detected  
50 the first Pacific Clade signature and ubiquitously distributed D2 haplotypes which postulate  
51 the legitimate dispersal of pigs associated with the multiple waves of human migrations  
52 involving the Philippines. The multimodal mismatch and neutrality test statistics both Fu's  
53  $F_s$  and Tajima's  $D$  correlates the long stationary period of effective population size revealed in  
54 the Bayesian skyline plot. While the sudden decrease in population was consistent with the  
55 pronounced population bottleneck of Asian and European pigs during the interglacial periods  
56 of the Pleistocene.

57

## 58 Introduction

59

60 The wild boar (*Sus scrofa* L.), recognized as the ancestor of the domestic pig, is one of the  
61 most widely distributed mammals found throughout Eurasia, including South and East Asia,  
62 and extending to North Africa. This species was also introduced into the Americas, Australia  
63 and Oceania [1]. Because of its relationship with human settlement and movement, studies on  
64 the phylogeography of *S. scrofa* have provided significant evidence revealing both  
65 anthropological and biogeographical history [2]. From the point of view of molecular  
66 phylogeny at a larger geographical scale, wild boars are genetically divided into Asian and  
67 European clades [3-6], which have split during the Mid-Pleistocene 1.6–0.8 Ma ago [7]. Wild  
68 boars from East and South-Eastern Asia predominantly have greater amounts of genetic  
69 variation than European wild boars, based on both mtDNA [4] and nuclear markers [8]. Island  
70 South-Eastern Asia (ISEA) and mainland South-Eastern Asia (MSEA), known to be the area  
71 of phylogenetic origin of wild boars, is a biodiversity hotspot where most other species in the  
72 genus *Sus* are present [9].

73 The Philippines is one of the most biologically rich regions in the world with  
74 exceptionally high levels of endemism for a country of its size. It has repeatedly been tagged  
75 as a region of global conservation priority – a top hotspot for both terrestrial and marine  
76 ecosystems [10-13]. The Philippine archipelago was believed to have never been connected to  
77 the Asian continent during the past glacial periods [14] hence, *S. scrofa* was unable to reach  
78 the archipelago from the MSEA [15-16]. Therefore, the *S. scrofa* that exists in the Philippines  
79 today might suggest some anthropogenic origin, likely arriving through human migration  
80 events [17]. The Austronesian settlers first colonized the Philippine archipelago around 4,000  
81 years ago [18-19] and were believed to have initiated the dispersal and translocation of pigs in

82 the country. From the Philippines they dispersed fairly rapidly to south and west into the ISEA  
83 [18-19]. They also moved east into the Marianas, and the Bismarck Archipelago, where the  
84 Lapita Complex developed around ca. 3300-3150 cal. BP. From there, they travelled further  
85 east into the Solomon Islands and Vanuatu, and eventually spread further into Remote Oceania  
86 [19]. However, the circumstantial lack of corroborating archaeological evidence supporting the  
87 introduction of pigs in the Philippines have long been daunting. Numerous archaeologists and  
88 geneticists have argued that connections with MSEA, as opposed to the “Out of Taiwan” model  
89 of dispersal are responsible for the introduction of the Austronesian languages and agriculture  
90 in ISEA [20-21]. This overlapping hypothesis was further aggravated by the absence of Pacific  
91 clade signatures both in Taiwan and the Philippines. For this reason, [22] precluded the  
92 Philippines as the point of departure further eastwards into the Pacific for domestic pigs. These  
93 haplotypes appear to have originated somewhere in peninsular Southeast Asia and were  
94 transported through Malaysia, Sumatra, Java, and islands in Wallacea such as Flores, Timor,  
95 and the Moluccas [4,22-24], and have shown strong support for the connection of Neolithic  
96 material culture between Vietnam and ISEA [20]. However, in contrast, some modern and  
97 ancient Philippine pigs possessed a unique haplotype stemming from the island of Lanyu  
98 (Orchid Island), located between the northern Philippines and southern Taiwan [25]. Despite  
99 these complex genetic evidence, molecular studies undertaken on pigs in the Philippines are  
100 still very limited thus, the pattern of pig expansion and dispersal remains ambiguous. Therefore,  
101 modern pig genetic studies could help elucidate the ongoing discussion on pig dispersal and  
102 migration involving the Philippines. Hence, this study aims at describing the mtDNA  
103 variability, genetic structure and phylogeographic origin of Philippine pigs, understanding if  
104 the currently observed genetic diversity and structure have a signature of past demographic  
105 expansion in reference to those observed in the MSEA and finally, contribute relevant insights

106 to the conflicting hypothesis proposed to explain the introduction of pigs involving the  
107 Philippines.

108

## 109 **Materials and Methods**

110

### 111 **Sampling and laboratory analysis**

112

113 In this study, blood samples and hair follicles of Philippine native pigs and wild pigs were  
114 sampled [S1 Appendix] in accordance with institutional, local and national guidelines  
115 regarding animal care and use in experimentation established by the Laboratory of Animal  
116 Genetics, Hiroshima University (No. 015A170426). Samples were preserved in tubes kept in -  
117 20°C. Photographs were obtained to document the morphological characteristics and  
118 differences within these pig populations (Fig 1). The genomic DNA was extracted using the  
119 phenol-chloroform method following the recommended protocol described by [26]. The 5.0-  
120 kbp mitochondrial DNA (mtDNA) fragment were amplified using a long and accurate – PCR  
121 kit (KOD FX-neo Polymerase, TOYOBO, Otsu, Japan) using the established primer set: Sus  
122 mt. 5.0 FL-2: 5'-ATGAAAATCATCGTTGTTACTTCAACTACAAGAAC-3'; Mum R: 5'-  
123 TTCAGACCGACCGGAGCAATCCAGGTCGGTTTCTATCTA-3'. The reaction began with  
124 an initial denaturation at 94°C for 2 min, followed by 30 cycles of denaturation at 98°C for  
125 10 sec, annealing at gradients at 57°C for 30 sec, and primer extension at 68°C for 2 min and  
126 30 sec. The last step was 8 min final extension period at 68°C. For mtDNA displacement (D-  
127 loop) region amplification, the ca. 1.3 kbp fragment was amplified using another primer set,  
128 Sus mtD F1: AACTCCACCATCAGCACCCAAAG, Sus mtD R1:  
129 CATTTCAGTGCCTTGCTTTGATA [27]. The reaction began with an initial denaturation

130 at 94°C for 2 min, after that, followed by 30 cycles of denaturation at 98°C for 10 sec,  
131 annealing at gradients 59°C for 30 sec, and extension at 68°C for 30 sec. The last step was a  
132 5 min final extension period at 68°C. The amplification was done using the GeneAmp PCR  
133 System 9700 (Applied Biosystems, Foster City, CA, USA). The PCR products from the  
134 segmental amplification were cleaned and purified using Exonuclease I (ExoI) and Shrimp  
135 Alkaline Phosphatase (SAP) to degrade the residual PCR primers and dephosphorylate the  
136 remaining dNTPs, respectively. After this, samples were sequenced using ABI3130 sequencer  
137 for direct DNA sequencing and fragment analysis.

138

139 **Fig 1 A sample of the morphological variations across Philippine native pigs.** a) Mambusao,  
140 Capiz. b) Barbaza, Antique. c) Dao, Capiz. d) Buenavista, Guimaras. e) Dingle, Iloilo. f)  
141 Nueva Valencia, Guimaras. g) Bugasong, Antique. h) Sebaste, Antique. i) Barbaza,  
142 Antique.

143

## 144 **Phylogenetic and population structure analysis**

145

146 The profile alignments of the mtDNA D-loop sequenced data were done through CLUSTAL  
147 W algorithm as implemented in the Molecular Evolutionary Genetics Analysis (MEGA) [28].  
148 About 1044 bp of the control region sequences were aligned and edited until one highly  
149 variable tandem repeat motif (5'-CGTGCGTACA-3') remained. Haplotype sequences were  
150 submitted to GenBank National Center for Biotechnology Information (NCBI) databases  
151 (MN625805-MN625830; MW924902-MW92973). To place our results in a broader context,  
152 sequences obtained from this study were shortened from the original size of 1044 bp to 510 bp  
153 to allow for comparison of the pooled sequences from the previously documented sequences  
154 from MSEA available in GenBank [S2 Appendix]. The diversity measures such as the number  
155 of polymorphic segregating sites (S), haplotype diversity (hd) and nucleotide diversity ( $\pi$ ) were

156 estimated by DNA Sequence Polymorphism (DnaSP) 5.10 software [29]. The genetic structure  
157 of the studied populations was assessed employing the analysis of molecular variance  
158 (AMOVA) as implemented in ARLEQUIN. Four genetic structure hypotheses based on  
159 geographical locations were tested namely, (1) Philippine pigs (no groupings); (2) Philippines  
160 vs. MSEA combined; (3) Philippines vs. Bhutan vs. Myanmar, Laos, Cambodia, and Vietnam;  
161 (4) Philippines vs. Bhutan and Myanmar vs. Cambodia, Lao and Vietnam. The extent of  
162 population genetic differentiation was further quantified by  $F_{ST}$  statistic using ARLEQUIN  
163 [30]. Fixation index ( $\Phi$ ) statistics of population genetics were calculated, and the significance  
164 of the variance component were performed using 1,000 random permutations.  $\Phi_{CT}$  is the  
165 difference among the groups of total haplotypes,  $\Phi_{SC}$  is the difference among populations  
166 within groups, and  $\Phi_{ST}$  is the difference among localities within populations. The AMOVA  
167 estimate genetic structure indices were determined using information on the allelic content of  
168 haplotypes as well as their frequencies [31]. All haplotypes were combined including the  
169 downloaded sequences represented animals classified as domestic and wild *S. scrofa* from  
170 Europe and Asia [S3 Appendix] for phylogeny reconstruction using the Maximum Likelihood  
171 (ML) inference with GTR+G+I as the best fitted model using PhyML v.3.0 [32] as Warthog  
172 (*Phacochoerus africanus*; DQ409327) as an outgroup. Bootstrap values were estimated with  
173 1,000 repetitions. To provide a more detailed information on the phylogenetic relationship  
174 among these haplotypes, a reduced median network was constructed using Network v.4.1 [33-  
175 34], available at [http:// www.fluxus-engineering.com](http://www.fluxus-engineering.com). This method calculates the net  
176 divergence of each taxon from all other taxa as the sum of the individual distances from  
177 variance within and among groups of Philippine pigs and comparison sequences. The  
178 nomenclatures described by Larson et al. (2005) with six clades (D1 to D6) including the newly  
179 proposed clade by Tanaka et al. (2008) were used as the reference for the clade notation.

180

## 181 **Population demographic analysis**

182

183 Demographic history was inferred by the analysis of the distribution of the number of site  
184 differences between pairs of sequences (mismatch distribution), which was carried out on the  
185 previously described pooled samples, as implemented in DnaSP 5.10 software [29]. Expected  
186 values for a model of population growth-decline were calculated and plotted against the  
187 observed values. Populations that have experienced a rapid demographic growth in the past  
188 show unimodal distributions, whereas those at demographic equilibrium or decline presents  
189 multimodal distributions [35]. Harpendings [36] raggedness index (*H<sub>ri</sub>*; quantifying the  
190 smoothness of the mismatch distributions and distinguishing between population expansion  
191 and stability) and the sum of squared deviations (SSD) (1,000 simulated samples of pairwise  
192 nucleotide differences), as implemented in ARLEQUIN [31], were used to evaluate the Rogers  
193 [37] sudden expansion model, which fits to a unimodal mismatch distribution [35]. To test for  
194 population expansion, we employed three other tests: Fu's [38]  $F_S$  and Tajima's  $D$  statistical  
195 tests using ARLEQUIN and testing their significance over 1,000 permutations; and Ramos-  
196 Onsins and Rozas  $R^2$  test [39] by means of DnaSP. Statistical tests and confidence intervals  
197 for  $F_S$  were based on a coalescent simulation algorithm and for  $R^2$  on parametric bootstrapping  
198 with coalescence simulations.

199 The past population dynamics were also explored with the Bayesian skyline plot (BSP)  
200 [40] model with standard Markov chain Monte Carlo sampling procedure (MCMC) under  
201 HKY + G model of substitution [41] with four gamma categories using Beast v.2.6.0 [42]. The  
202 BSP represents population size changes over time, inferred with mtDNA and the assumed  
203 mutation rate. Two independent analyses were performed using all sequences from this study  
204 and the 130 sequences from MSEA using  $1.36 \times 10^{-8}$  mutation rate (mutation rate per



205 nucleotide site per year according to previously estimates for mammalian mtDNA control  
206 region; [43]) under the strict clock. The MCMC analysis was run for 50,000,000 generations.  
207 Independent runs (logs and trees) were pooled using Log Combiner, discarding burn-in of the  
208 first 10% and parameter values were sampled every 5,000 generations. Tracer v.1.7 as used to  
209 confirm correct MCMC chain convergence with an effective sample size (ESS) > 200 within  
210 the Log files, and to visualize the dynamics of the effective population size over time. The  
211 light-blue shaded area marks the 95% highest posterior density (HPD). The X-axes are time in  
212 thousands of years before present (BP) and the Y-axes are the mean effective population size  
213 in millions of individuals divided by generation time on a log scale.

214

## 215 **Results**

216

### 217 **Genetic diversity and population differentiation**

218

219 Overall, 236 sequences including the 106 Philippine native pigs (two wild pigs were excluded)  
220 were used to measure population genetic structure and differentiation. The nucleotide  
221 sequences were aligned relative to the representative haplotypes of Asian domestic pigs under  
222 accession number AB041480 [S4 Appendix]. In the alignment of sequences, all the variable  
223 sites represented substitution mutation. Overall, 23 haplotypes were detected from the  
224 Philippines (PHL), 11 in Cambodia, 9 in Bhutan, 10 in Laos, 17 in Myanmar, and 4 in Vietnam  
225 (Table 1). These sequences collapsed when pooled from 76 to 57 haplotypes. Twenty-six (6  
226 PH and 20 MSEA) of the 57 haplotypes were represented by a single sequence. The highest  
227 number of shared individuals was noted in PH37 haplotype consisting of 31 sequences (25 PH  
228 and 6 MSEA; 13.59%) which corresponds to D7 haplogroup and was previously referred as

229 the mitochondrial Southeast Asian haplogroup (MTSEA) [44]. The haplotype diversity of  
 230 native and domestic pigs in MSEA when combined was  $0.966 \pm 0.006$  with Myanmar showing  
 231 the highest haplotype diversity ( $0.958 \pm 0.018$ ), followed by Laos with  $0.925 \pm 0.047$  and the  
 232 Philippines with  $0.900 \pm 0.016$ . Meanwhile, the lowest haplotype diversity was observed from  
 233 Vietnam ( $0.800 \pm 0.172$ ). On the other hand, nucleotide diversity ( $\pi$ ) was highest in the  
 234 Philippines ( $0.012 \pm 0.006$ ), closely similar to Bhutan ( $0.010 \pm 0.006$ ), while the lowest was  
 235 noted in Vietnam pigs ( $0.004 \pm 0.003$ ). However, the small sample number size of pigs from  
 236 Vietnam may account for its apparent low genetic diversity.

237

238 Table 1 mtDNA indices of Philippine native pigs and mainland Southeast Asian pigs

| COUNTRIES | n   | vs | P  | S  | #h | MPD               | h                 | $\pi$             |
|-----------|-----|----|----|----|----|-------------------|-------------------|-------------------|
| KHM       | 49  | 13 | 9  | 4  | 11 | $4.272 \pm 2.154$ | $0.854 \pm 0.028$ | $0.008 \pm 0.005$ |
| BTN       | 30  | 16 | 9  | 7  | 9  | $4.855 \pm 2.436$ | $0.807 \pm 0.051$ | $0.010 \pm 0.006$ |
| LAO       | 16  | 12 | 8  | 4  | 10 | $3.867 \pm 2.049$ | $0.925 \pm 0.047$ | $0.008 \pm 0.005$ |
| MMR       | 29  | 18 | 11 | 7  | 17 | $4.502 \pm 2.282$ | $0.958 \pm 0.018$ | $0.009 \pm 0.005$ |
| VNM       | 6   | 4  | 2  | 2  | 4  | $2.000 \pm 1.304$ | $0.800 \pm 0.172$ | $0.004 \pm 0.003$ |
| TOTAL     | 130 | 37 | 23 | 14 | 44 |                   | $0.966 \pm 0.006$ | $0.010 \pm 0.006$ |
| PHL       | 106 | 29 | 25 | 4  | 22 | $5.207 \pm 2.542$ | $0.900 \pm 0.016$ | $0.012 \pm 0.006$ |

239 PHL= Philippines; KHM= Cambodia; BTN= Bhutan; MMR= Myanmar; VNM= Vietnam; n= number of samples;  
 240 vs= variable sites; P= parsimony informative sites; S= singleton variable sites; #h= number of haplotypes; MPD=  
 241 mean pairwise differences (SD); h= gene diversity: haplotype level (SD);  $\pi$ = nucleotide diversity (SD).

242

243 Based on the AMOVA of mtDNA D-loop data, all hypothesis subjected for analysis  
 244 revealed a significant population subdivision ( $\Phi_{ST}$  values,  $p < 0.01$ ) which suggests a distinct  
 245 genetic structure in all studied geographical locations (Table 2). The inference of genetic  
 246 differentiation was equally evident in both the neighbor-joining and network analyses (Figs 2  
 247 and 3). The pairwise  $F_{ST}$  estimate ranged from 0.050 to 0.476 (Table 3A) showed significantly  
 248 higher genetic differentiation ( $\Phi_{ST}$  values,  $p < 0.01$ ) observed between most pigs in the studied  
 249 populations and between Philippine islands. However, insignificant and small pairwise  $\Phi_{ST}$   
 250 estimates were noticed in Laos and Cambodian pigs ( $\Phi_{ST} = 0.050$ ;  $p = 0.0631$ ), indicating that

251 pigs from these countries were not isolated from each other. The corrected average pairwise  
 252 differences revealed consistent tendencies with the pairwise  $\Phi_{ST}$  (Table 3B).

253  
 254 Table 2 Analysis of molecular variance (AMOVA) of Philippine native pigs and mainland  
 255 Southeast Asian pigs

| HYPOTHESIS                            | Sources of variation            | % Variation | $\Phi$                 |
|---------------------------------------|---------------------------------|-------------|------------------------|
| PHL pigs<br>(No groupings)            | Among populations               | 16.95**     | $\Phi_{ST} = 0.16952$  |
|                                       | Within populations              | 83.05       | $\Phi_{SC} = 0.83052$  |
| PHL vs. MSEA<br>combined              | Among groups                    | -9.34       | $\Phi_{CT} = -0.09338$ |
|                                       | Among populations within groups | 21.47**     | $\Phi_{SC} = 0.19639$  |
|                                       | Within populations              | 87.87**     | $\Phi_{ST} = 0.12135$  |
| PHL vs. BTN vs. MMR,<br>VNM, KHM, LAO | Among groups                    | 0.01        | $\Phi_{CT} = 0.00006$  |
|                                       | Among populations within groups | 14.61**     | $\Phi_{SC} = 0.14614$  |
|                                       | Within populations              | 85.38**     | $\Phi_{ST} = 0.14619$  |
| PHL vs. BTN, MMR vs.<br>VNM, KHM, LAO | Among groups                    | 2.51        | $\Phi_{CT} = 0.14837$  |
|                                       | Among populations within groups | 12.33**     | $\Phi_{SC} = 0.12644$  |
|                                       | Within populations              | 85.16**     | $\Phi_{ST} = 0.14837$  |

256 \*\* $p < 0.01$  as tested by randomization (1000 permutations) using ARLEQUIN; MSEA = Mainland Southeast Asia;  
 257 PHL = Philippines; KHM = Cambodia; BTN = Bhutan; MMR = Myanmar; VNM = Vietnam;  $\Phi_{CT}$  = the difference  
 258 among the groups of total haplotypes;  $\Phi_{SC}$  = the difference among populations within groups;  $\Phi_{ST}$  = the difference  
 259 among localities within populations.

261 Table 3 Genetic divergence among populations of Philippine native pigs and mainland  
 262 Southeast Asian pigs

| (a) Population pairwise $F_{ST}$           | KHM     | BTN     | LAO     | MMR     | VNM     | PHL     |
|--------------------------------------------|---------|---------|---------|---------|---------|---------|
| Countries                                  |         |         |         |         |         |         |
| KHM                                        | -       | 0.301   | 0.050   | 0.169   | 0.280   | 0.061   |
| BTN                                        | <0.0001 | -       | 0.393   | 0.150   | 0.214   | 0.186   |
| LAO                                        | 0.0721  | <0.0001 | -       | 0.261   | 0.476   | 0.105   |
| MMR                                        | <0.0001 | <0.0001 | <0.0001 | -       | 0.203   | 0.086   |
| VNM                                        | <0.0001 | 0.0091  | <0.0001 | <0.0001 | -       | 0.120   |
| PHL                                        | <0.0001 | <0.0001 | <0.0001 | <0.0001 | 0.0270  | -       |
| (b) Population average pairwise difference |         |         |         |         |         |         |
| KHM                                        |         | 6.911** | 4.296   | 5.272** | 4.884** | 5.01    |
| BTN                                        | 1.928** |         | 7.296** | 5.508** | 4.833   | 1.673** |
| LAO                                        | 0.227   | 2.935** |         | 5.707** | 6.125** | 0.568** |
| MMR                                        | 0.884** | 0.839** | 1.522** |         | 4.471*  | 0.704** |

|     |         |         |         |        |      |        |
|-----|---------|---------|---------|--------|------|--------|
| VNM | 1.748** | 1.406*  | 3.192** | 1.22** |      | 1.407* |
| PHL | 5.01    | 6.704** | 5.105   | 5.559  | 5.01 |        |

263 (a) mtDNA sequence divergence was estimated using distance method of pairwise difference. Upper triangular  
264 matrix: population pairwise estimates of  $F_{ST}$ ; lower triangular matrix: the  $p$ -values for the  $F_{ST}$ ; (b) average  
265 pairwise genetic difference between countries. Upper triangle matrix: Average number of pairwise differences  
266 between populations ( $Pi_{XY}$ ); diagonal elements: Average number of pairwise differences within population  
267 ( $Pi_X$ ); lower triangular matrix: corrected average pairwise difference [ $Pi_{XY} - (Pi_X + Pi_Y)/2$ ]. PHL=  
268 Philippines; KHM= Cambodia; BTN= Bhutan; MMR= Myanmar; VNM= Vietnam. \* $p < 0.05$ ; \*\* $p < 0.01$  as  
269 tested by randomization (1000 permutations) using ARLEQUIN.

270  
271

272 To investigate the relationship of Philippine native pigs from those Asian and European  
273 pigs, we included 40 sequences [4] to accommodate most of the major mtDNA porcine  
274 haplotypes. Overall, a total of 285 sequences were used to perform the phylogenetic tree and  
275 median-joining network analysis. The NJ tree branched into two core lineages, one of Asian  
276 phylogeographic origins and one of European phylogeographic origins (Fig 2). Network  
277 analysis generally supported the phylogenetic tree and revealed a strong genetic structuring  
278 among Philippine pig haplotypes where different phylogroups could be observed (Fig 3). A  
279 widespread Asian ancestry (94.90%) was observed in all Philippine pig haplotypes studied.  
280 Seven (PHL1, 5, 7, 8, 14, 16 and 18) of 21 Philippine pig haplotypes nested under the D7  
281 haplogroup (referred earlier as MTSEA), which consists of 54.08% of the total studied  
282 population. This haplogroup was earlier reported in the MSEA as restricted to the Indo-Burma  
283 Biodiversity Hotspots (IBBH) [44] and as a distinct clade and which was not described in  
284 previous studies [4]. Eight haplotypes (PHL2, 3, 4, 6, 8, 9, 11 and 12; 36.73%) were distributed  
285 in the D2 haplogroup which corresponds to what [5] recognized as widely distributed Chinese  
286 domestic pigs, a global pig breed that has some relationship with Asian pigs, as well as with  
287 East Asian wild boars [45-46]. Three haplotypes (PHL17, 19 and 20; 5.10%) revealed the  
288 presence of admixed ancestry in D1 haplogroup (European clade), harboring different fractions  
289 of maternal lineages from Berkshire and Landrace. Intriguingly, one and three haplotypes  
290 clustered under the Pacific Clade (PHL13) and the distinct Type I Lanyu pig (PHL15, 22 and  
291 23), respectively. As we shall discuss later, there had been no similar haplotypes reported in

292 previous studies on the existence of Pacific clade haplotypes in the Philippines. One haplotype  
293 (PHL21) of a Philippine wild pig cannot be classified under any of the proposed haplogroups  
294 and formed a vague cluster from the nomenclature quotation of porcine mtDNA control region  
295 haplotypes found in the previous researches. It possessed a unique nucleotide polymorphism  
296 at sites T54C, C127T, A148G, T406C, G407A and a transversion substitution at the base G88T  
297 [S4 Appendix]. Thus, we propose that the mtDNA haplotypes in these individuals should be  
298 classified into a distinct cluster with a potential for recognizing novel subspecies of wild pigs  
299 in the Philippines.

300

301 **Fig 2 Phylogenetic relationships of Philippine native pigs and wild pigs with continental**  
302 **domestic and wild boar. The number indicated in the nodes were bootstrap**  
303 **supports based on 1,000 replicates with warthog as the outgroup. Bootstrap values**  
304 **lower than 50% were not shown. Philippine pigs revealed to comprised founder**  
305 **sources from five different geographic origins excluding the endemic Philippine**  
306 **wild pigs.**

307

308

309 **Fig 3 The median-joining network of Asian and European pig haplotypes including the**  
310 **global reference sequences showing haplogroup classification. Some haplotypes**  
311 **clustered together coinciding with their geographic area of origin, while selected**  
312 **haplotypes diverse and shared by individuals of different breeds from different**  
313 **geographical regions, indicating a negative correspondence between the geographic**  
314 **origin and the relationships among breeds. The size of each circle is proportional to**  
315 **the haplotype frequency. Color represents regions of sequence origin.**

316

317

## 318 **Past population dynamics**

319

320 The mismatch distributions were also calculated to investigate the hypothesis of  
321 population expansion. The distribution of pairwise nucleotide differences of the studied  
322 Philippine pig populations revealed multimodal patterns of mismatch distribution (Fig 4A),  
323 which may suggest a population in decline or stable demographic equilibrium. On the contrary,  
324 pigs in MSEA combined revealed a unimodal mismatch distribution, significant and large

325 negative  $F_u$ 's  $F_S$  value (-25.282;  $p < 0.01$ ), together with the small and non-significant value of  
326 Harpending's raggedness index ( $H_{ri}$ ), likely supporting a scenario of demographic expansion  
327 experienced in the past (Fig 4B; Table 4). When the effects of natural selection and past  
328 demographic changes are examined in each of the populations per country using the Tajima's  
329  $D$  and  $F_u$ 's  $F_S$  estimates, only Myanmar had a significantly negative  $F_u$ 's  $F_S$  values (-6.542;  
330  $p < 0.05$ ) while all Tajima's  $D$  values for all populations were not significant ( $p = 0.05$ ; Table 4;  
331 Fig 5). In addition, negative  $F_u$ 's  $F_S$  estimates were observed in pigs in the Philippines (-1.503;  
332  $p = 0.05$ ), Laos (-2.73;  $p = 0.05$ ) and Vietnam (-0.0499;  $p = 0.05$ ). The Ramos-Onsins & Rozas'  
333  $R^2$  tests [39] were not significant in all cases, except for the MSEA samples combined ( $p < 0.05$ ).  
334 The null hypothesis of expectation under the sudden expansion model such as the sum square  
335 deviation and raggedness test result ( $p = 0.05$ ) on coalescent estimates, was not statistically  
336 supported in all subject locations, except for the combined MSEA samples. The analysis of the  
337 prehistoric population size dynamics of Philippine native pigs using BSP was consistent with  
338 the result from the mismatch distribution analyses. As projected by the BSP, the Philippine  
339 native pig population revealed a long stationary period of effective population size (Fig 6A).  
340 The sudden population decrease event occurred roughly at about ~25,000 years before present  
341 (BP). At the regional scale, MSEA pigs marked a gradual significant increase in population  
342 approximately during the Late Pleistocene ages (Fig 6B).

343  
344 **Fig 4 Mismatch distributions of mitochondrial DNA sequences of the (A) Philippine pigs,**  
345 **(B) mainland SEA pigs based on pairwise nucleotide differences.**

346  
347 **Fig 5 Mismatch distributions of mitochondrial DNA sequences of countries in mainland**  
348 **Southeast Asian pigs based on pairwise nucleotide differences.**

349  
350 **Fig 6 Bayesian skyline plots showing effective population size of (A) Philippine and (B)**  
351 **mainland Southeast Asian pigs. Median estimates of female effective population size**  
352 **( $N_{ef}$ ) are shown as solid thick line (blue) and the light-blue shaded area marks the**  
353 **95% credibility intervals. The abscissa is scaled in thousands of years before present**  
354 **(BP). The Philippine pigs revealed a long stationary period of effective population**  
355 **size and the sudden population decrease event occurred roughly at about ~25,000**  
356 **BP.**

357 Table 4 Values of neutrality test (Fu's  $F_S$  and Tajima's D), sum of square deviation (SSD) and  
358 Harpending's raggedness index ( $H_{ri}$ ) for Philippine native pigs and MSEA pig  
359 mtDNA D-loop region

| COUNTRIES | Fu's $F_S$ test | Tajima's D test | SSD    | $H_{ri}$ |
|-----------|-----------------|-----------------|--------|----------|
| KHM       | 0.421           | 1.400           | 0.054* | 0.101*   |
| BTN       | 1.049           | 0.678           | 0.048  | 0.089    |
| LAO       | -2.73           | 0.264           | 0.035  | 0.061    |
| MMR       | -6.542*         | -0.061          | 0.004  | 0.016    |
| VNM       | -0.499          | 0.768           | 0.037  | 0.129    |
| TOTAL     | -25.282**       | -0.014          | 0.006  | 0.012    |
| PHL       | -1.503          | 0.231           | 0.017  | 0.020    |

360 \* $p < 0.05$ ; \*\* $p < 0.01$  as tested by randomization (1000 permutations) using ARLEQUIN. PHL= Philippines;  
361 KHM= Cambodia; BTN= Bhutan; MMR= Myanmar; VNM= Vietnam.

362

363

## 364 Discussion

365

366 Literature on genetic studies in Philippine pigs is scarce, although this animal represents  
367 excellent genetic resources for the local economy and underlies as a genetic basis to study  
368 human settlements and migration. This study provides the first comprehensive data on the  
369 history of dispersal, genetic structure and diversity, and population dynamics of Philippine  
370 native pigs. Previous studies have revealed multiple centers of pig domestication (six major  
371 clusters, denoted as D1 to D6) and the existence of a clear phylogenetic structure of mtDNA  
372 D-loop region sequences found in wild boars and domestic pigs [3-4], and their possible  
373 association with the hypothesized Neolithic expansion in Island South East Asia and Oceania  
374 [4]. Therefore, the patterns of haplotype distribution seen in this study can be associated with  
375 the importance of identifying the prehistoric arrival of domestic pigs in the Philippines, and  
376 it's spread across the islands as rooted to the hypothesized migratory route of Neolithic  
377 Austronesian-speaking populations from Taiwan into the Philippines [47-48] and the possible  
378 pig dispersal that occurred from ISEA via Palawan and the Sulu Archipelago. The phylogenetic



379 patterns in the current study generally agreed on the existing two core lineages, one of the  
380 Asian phylogeographic origins and one of the European phylogeographic origins. The  
381 distribution of the haplotype frequencies indicated no equilibrium thus, the geographically  
382 distributed haplotypes suggested that the present-day Philippine native pigs have multiple  
383 ancestral origins spread across the Eurasian Continent. The close genetic connection between  
384 the continental wild boars and domestic pigs from the MSEA and NEA present in the Philippine  
385 pig genetic pool corroborates our hypothesis of a genetic signal that could potentially be  
386 associated with the recently reported multiple waves of human migrations to the Philippines  
387 during the last 50,000 years [49]. During the glacial periods, extensive gene flow has suggested  
388 to occurred among the *Sus* species [50] and was considered as an important driving factor that  
389 has established the present-day geographic distribution of *Sus* populations throughout the  
390 world [51]. Thus, these events may have paved the way for these pigs with multiple ancestral  
391 lineages to be introduced in the country, including domestic animals like chickens [52], goats  
392 [53], cattle [54], and other species that have adapted to local conditions and developed  
393 distinctive characteristics. While the preliminary studies that revealed the absence of the  
394 Pacific Clade in the Philippine Archipelago [24] have led some researchers to challenge the  
395 veracity of pig dispersal from the NEA throughout the Pacific Islands via the Philippines [22].  
396 This study reported the first Pacific Clade signature and the ubiquitously distributed D2  
397 haplotypes which could potentially shed light on the question of pig dispersal by the  
398 Austronesian-speaking populations from NEA via the Philippines. Furthermore, the close  
399 genetic association of three haplotypes (PHL15,22-23) to Lanyu pigs of Taiwan strongly  
400 suggests an mtDNA maternally derived from the same lineage. Therefore, these patterns of the  
401 genetic variation in contemporary Philippine pigs could mirror the multilayered history of the  
402 Philippines as a nation with a rich history of trade and bartering of voyagers with coastal  
403 communities, including the riverine movements into near-coastal settlements during



404 prehistoric and protohistoric times [55] that has contributed significantly to the genetic  
405 landscape of the Asia-Pacific region [49].

406 Before the European arrived in the Philippines during the Spanish colonization, there  
407 was indication that pigs were introduced already by the Chinese traders [56], and subsequently  
408 followed by the intensive importation of various exotic pig breeds from Europe [57] that has  
409 resulted in a diversified Philippine pig genetic pool. This hypothesis is precisely evident as  
410 shown by the close genetic relationships between Philippine native pigs and Chinese pigs,  
411 which exhibited by the similarities in their morphology and mtDNA variation due to  
412 introgression. It is undeniable that the Chinese mtDNA footprint was imperative in the history  
413 of Philippine native pig development. Compared to the high signal of genetic introgression of  
414 Chinese pig breeds into Philippine native pigs, European pig maternal introgression was  
415 minimal which constitute only about 5.10% of the studied population. This observation was  
416 congruent with the situation among domestic pigs in MSEA where the mtDNA of European  
417 pigs was considered to have a negligible impact on the maternal origin of domestic and native  
418 pigs. Considering our sampling as aggregates of both lowland and upland areas, our visual  
419 observation and molecular result implies that the exotic pig breeds have not yet fully penetrated  
420 the remote areas in the Philippines. While the pervasive indiscriminate hybridization between  
421 exotic pig breeds and native pigs (i.e., Berkshire or Duroc x Philippine native pigs) in the  
422 lowland areas could pose an important challenge from a long-term management perspective.  
423 Previously, it was underscored that the European pigs have both Asian and European pig  
424 mtDNA, resulted from the extensive history of crossbreeding between European and Asian  
425 pigs with the predominance of Asian mtDNA introgression [58-59,3] and now constitutes  
426 about 20-35% of Asian matrilineal origin [60-62]. Hence, this concurrent maternal  
427 introgression of the global breeds, which currently contributes about 30% in D2 haplogroup

428 and widely distributed in Chinese pigs, cannot be rejected, as it was evident in the maternal  
429 signatures of domestic pigs in almost all of Asia.

430 Our results indicated a high proportion of Philippine pig haplotypes (49.07%; 53/108  
431 individuals) that fell under the D7 haplogroup compared to the previously identified similar  
432 haplotypes in MSEA (34.62%; 45/130 individuals). This haplogroup was not previously  
433 reported in Chinese pigs and has precluded the origin of these haplotypes out of China [44].  
434 As reported earlier, this haplogroup was the most recent pig mtDNA lineage discovered,  
435 distinct from those in previously documented centers of pig domestication. Due to the absence  
436 of a similar haplotype in the Insular and NEA regions, the phylogeographic origin of the Phil-  
437 D7 (Philippine type-D7 haplotypes) represents an interesting question, as its haplotype  
438 distribution does not primarily suggest the IBBH as the direct origin of the Phil-D7 or the  
439 probability of whether these haplotypes were established as a result of a human-mediated  
440 introduction into the Philippines. Further, the pattern of the distribution of haplotypes does not  
441 coincide within the hypothesized migratory route of the Neolithic Austronesian-speaking  
442 populations, and likewise with the possible pig ancestral diffusion that occurred from the ISEA  
443 to the Philippines sometime during the interglacial periods of the Pleistocene. While recent  
444 studies on combining mitochondrial DNA and geometric morphometric of the pig have shown  
445 some human-mediated dispersal in some islands of Southeast Asia [63,16,23,25], there is  
446 presently no genetic data nor archaeological material that provide evidence for any prehistoric  
447 translocation of Philippine pigs between the islands of the archipelago [24,64]. However,  
448 assuming that haplotypes between these two geographic locations originate from one ancestral  
449 lineage, the significant population differentiation, despite sharing of haplotypes, could be  
450 suspected as a consequence of geographical isolation. The vicariance brought about by the  
451 severe Quaternary Sea level drops resulted in the isolation of populations due to the formation  
452 of geographic barriers to migration and consequent genetic divergence between these

453 populations [64]. Population differentiation usually occurs when there is migration of a certain  
454 population away from its founder population which leads to a reduction in genetic diversity as  
455 predicted by the theory of Genetic Isolation by Distance. Moreover, an expansion model from  
456 a single founder predicts that patterns of genetic diversity in populations can be thoroughly  
457 explained by their geographic expansion from the founders, concomitant to genetic  
458 differentiation [65].

459         The Philippine wild pigs are known or reported from all of the larger and many of the  
460 smaller, offshore islands in the Philippines [15]. In this study, the relatively high degree of  
461 genetic variation detected in Philippine wild pig haplotypes between the observed populations  
462 including samples from the GenBank is compelling. The phylogenetic tree and haplotype  
463 network analyses illustrated an extremely vague cluster among other wild boars. Therefore, in  
464 this current study, it seems that the mtDNA of Philippine wild pig does not have a significant  
465 maternal contribution to Philippines native pigs disparate from the limited information  
466 suggesting that it was derived from the numerous wild pigs in the country.

467         The haplotype diversity of the studied Philippine native pig population was generally  
468 moderate and similar with those in the MSEA countries such as Laos and Myanmar, while  
469 relatively higher compared to those from Cambodia, Bhutan, and Vietnam. The nucleotide  
470 diversity, however, was remarkably higher in Philippine native pigs. As emphasized previously,  
471 nucleotide diversity represents a more suitable parameter than haplotype diversity in estimating  
472 the genetic diversity in a population [66], as it addresses both the frequency of haplotypes and  
473 the nucleotide differences between haplotypes. These values were relatively higher in the  
474 previously reported pig nucleotide diversity in southern China including Yunnan, the Tibetan  
475 highlands, the extensive basins of the Yangtze and Yellow Rivers, Taiwan and some Pacific  
476 Islands. These are similar to those found in the outlying areas of ISEA, Korea [67,62] and  
477 Bhutan. This pattern of genetic variation suggests a scenario that reflects past expansion

478 dynamics from the species area of origin [68], owing to subsequent translocations by humans  
479 and the effects of introgression between different DNA lineages [69]. Also, [68] have  
480 previously discussed that the present large-scale pattern of genetic variability in *Sus* can be  
481 linked to one or more ancient long-distance colonization events followed by divergence of  
482 isolated lineages, geographical extinction due to local extinction within a previously  
483 continuous distributional range, and isolation by distance which resulted in restricted gene flow.

484         The genetic fixation observed in the studied Philippine native pig populations, reported  
485 as  $F_{ST}$ , indicated that gene flow is limited among individuals which suggested populations  
486 between regions are genetically isolated from each other. Nevertheless, this is an expected  
487 population scenario for the Philippine native pigs where the natural genetic exchange is  
488 confined as a result of the archipelagic geographical setting of the Philippines. During the past  
489 glacial periods, the Philippine archipelago was believed to have never been connected to the  
490 Asian continent [15-16,14], which has influenced restricted genetic exchange and mtDNA  
491 distribution of pigs throughout the islands.

492

## 493 **Past population dynamics**

494

495 The historical demography of Philippine native pig populations was examined using mismatch  
496 distributions which represent the frequency distribution of pairwise differences among all  
497 sampled haplotypes. Theoretical studies have shown that population bottlenecks and  
498 population expansions cause a sound effect on the pattern of genetic polymorphism among  
499 haplotypes in the population [35]. The multimodal pattern of the mismatch distribution in  
500 Philippine native pigs can be assumed to have undergone irrelevant demographic expansion  
501 that have occurred over a long time and that the population could have been shown long-term

502 stability or decline. In addition, the neutrality test based on both the Tajima's D ( $p=0.05$ ) and  
503 Fu's  $F_S$  statistics ( $p=0.05$ ) was not consistent with the recent population and demographic  
504 expansions. The Fu's  $F_S$  test is highly sensitive to demographic expansion which results in  
505 large negative  $F_S$  values, whereas the significant Tajima's D value could be a sign of population  
506 expansion and bottleneck [70-72]. The  $R^2$  statistics and the simulation based on coalescent  
507 process as quantified by the raggedness index confirmed the mismatch distribution of the  
508 studied populations. The haplotypic and genealogical relationship portrayed in the reduced-  
509 median network, despite a significant population subdivision among population, also showed  
510 no geographic structuring except for a few star-like patterns. In general, a population that has  
511 gone through a recent population expansion displays a star-like structure in a network tree,  
512 smooth, and unimodal mismatch distribution [38] because most alleles descended from one or  
513 a few ancestral types [35]. Therefore, the reflected mismatch distribution could be a signature  
514 of the presence of different haplogroups detected rather than a demographic stability.

515         The Bayesian skyline plot revealed a sudden decrease in population during the  
516 interglacial periods of the Late Pleistocene. The cyclic sea level fluctuations during these  
517 periods are regarded as one of the most important events involved in shaping the contemporary  
518 geographic distribution of genetic variation and evolutionary dynamics of the population [73-  
519 75]. Moreover, the alleged decline in the population of some animals has occurred because of  
520 glacial-interglacial episodes [76-77]. This is a consistent population scenario experienced by  
521 both Asian and European wild boars, where they experienced population bottlenecks during  
522 the Last Glacial Maximum (LGM; ~20,000 years ago). A considerable drop in population size  
523 was more pronounced in Europe than in Asia which has caused the low genetic diversity seen  
524 in modern European wild boars [60]. The recent Ice Age has also caused a huge sea level drop  
525 of about 120 m below the present level, exposing huge areas as dry land, but the Philippines  
526 remained isolated by deep channels. Conceivably, this influenced the land distribution of pigs

527 in the Philippine archipelago that resulted to their geographic isolation and subsequently  
528 restricted gene flow. The effects of bottlenecks are evident in populations occupying smaller  
529 geographic ranges which are vulnerable to stochastic events and genetic drift compared to  
530 larger and more widespread populations [78]. Our result of a population expansion in MSEA  
531 pig was in contrary with the population scenario reported by [50], and a more severe bottleneck  
532 in ISEA during the Pleistocene periods. These population declines are consistent with the  
533 reduction of temperature during this period that would have reduced the overall forest cover in  
534 these areas [79-80,50].

535

## 536 **Conclusion**

537

538 This study provided critical insights that will properly help address the contradicting hypothesis  
539 of a possible human-mediated translocation and exchange of pigs involving the Philippines.  
540 The results of our study could support the Neolithic-Austronesian model of expansion while a  
541 more rigorous investigation should be carried out in linking the possible pig ancestral diffusion  
542 that took place from MSEA via Sundaland to the Philippines. The unique geographical features  
543 of the Philippines have resulted in an insignificant migration flow of pigs and as a long-term  
544 consequence, geographical isolation had occurred. The underlying sudden population decline  
545 as predicted in the BSP markedly followed the LGM period. Ultimately, the escalating rate of  
546 hybridization of Philippine native pigs with commercial stocks in the Philippines represents a  
547 severe risk for native pig populations. Therefore, urgent conservation measures and suitable  
548 management of their genetic pool are crucial in the management of animal genetic resources  
549 at the local and global levels. For future perspectives, Y-specific markers could be performed  
550 to assess the level of male-mediated introgression of European pigs into Philippine native pigs.

551

## 552 **Acknowledgements**

553

554 We are indebted to Dr. Lawrence M. Liao for the technical support and numerous insights that  
555 greatly improved this work. We thank Cyrill John Prima Godinez, Jant Cres Caigoy, and all  
556 the members of the Animal Genetics Laboratory of Hiroshima University. We thank the  
557 Visayas State University, Capiz State University, Aklan State University, Iloilo State College  
558 of Fisheries, farmers, and backyard pig raisers throughout the Visayas for the help during our  
559 sampling.

560

## 561 **References**

562

- 563 1. Ruvinsky A, Rothschild MF, Larson G, Gongora J. Systematics and evolution of the  
564 pig. In: Rothschild MF, Ruvinsky A, (eds). *The Genetics of the Pig*. Oxfordshire: CAB  
565 International; 2011. pp. 1–13.
- 566 2. Epstein J, Bichard M. *Pig In: Evolution of Domesticated Animals*. New York, NY:  
567 Longman; 1984. pp. 145–162.
- 568 3. Giuffra E, Kijas JMH, Amarger V, Calborg O, Jeon J-T, Andersson L. The origin of  
569 the domestic pig: Independent domestication and subsequent introgression. *Genetics*.  
570 2000;154: 1785–1991.
- 571 4. Larson G, Dobney K, Albarella U, Fang M, Smith EM, Robins J, Lowden S, Finlayson  
572 H, Brand T, Willerslev E, Conwy PR, Andersson L, Cooper A. Worldwide  
573 phylogeography of wild boar reveals multiple centers of pig domestication. *Science*.  
574 2005;307: 1618–1621.
- 575 5. Scandura M, Iacolina L, Crestanello B, Pecchioli E, Di Benedetto MF, Russo  
576 V, Davoli R, Apollonio M, Bertorelle G. Ancient vs. recent processes as factors  
577 shaping the genetic variation of the European wild boar: Are the effects of the last  
578 glaciation still detectable? *Molecular Ecology*. 2008;17: 1745–1762.
- 579 6. Vilaca ST, Biosa D, Zachos F, Iacolina L, Kirschning J, Alves PC. Mitochondrial  
580 phylogeography of the European wild boar: The effect of climate on genetic diversity  
581 and spatial lineage sorting across Europe. *Journal of Biogeography*. 2014;41(5): 987–  
582 998.
- 583 7. Frantz LAF, Meijaard E, Gongora J, Haile J, Groenen MAM, Larson G. The evolution  
584 of Suidae. *Annual Review of Animal Bioscience*. 2016;4(1): 61–85.



- 585 8. Ramirez O, Ojeda A, Tomàs A, Gallardo D, Huang LS, Folch JM. Integrating Y-  
586 chromosome, mitochondrial, and autosomal data to analyze the origin of pig breeds.  
587 *Molecular Biology and Evolution*. 2009;26(9): 2061-2072.
- 588 9. Amills M, Megens H-J, Manunza A, Ramos-Onsins SE, Groenen MA. A genomic  
589 perspective on wild boar demography and evolution. In: Meletti M, Meijaard E, editors.  
590 Ecology, Conservation and Management of Wild Pigs and Peccaries. *Cambridge*  
591 *University Press*; 2017. pp. 376–387.
- 592 10. Heaney L, Mittermeier RA. 1997. The Philippines. In: Mittermeier RA, Mittermeier  
593 CG, Robles GP. Me (eds) Megadiversity: Earth's Biologically Wealthiest Nations.  
594 Monterrey (Mexico), CEMEX; 1997. pp. 236-255.
- 595 11. Myers N, Mittermeier RA, Mittermeier CG, da Fonseca GAB, Kent J. Biodiversity  
596 hotspots for conservation priorities. *Nature*. 2000;403: 853-858.
- 597 12. Roberts CM. Marine biodiversity hotspots and conservation priorities for tropical reefs.  
598 *Science*. 2002;295: 1280-1284.
- 599 13. Posa MRC, Diesmos AC, Sodhi NC, Brooks TM. Hope for threatened tropical biodiversity:  
600 Lessons from the Philippines. *Bioscience*. 2008;58(3): 231-240.
- 601 14. Voris HK. Maps of Pleistocene sea levels in Southeast Asia: Shorelines, river systems  
602 and time durations. *Journal of Biogeography*. 2000;27: 1153–1167.
- 603 15. Oliver WLR. The taxonomy, distribution and status of Philippine wild pigs. *Ibex*,  
604 *Journal of Mountain Ecology*. 1995;3: 26–32.
- 605 16. Groves CP. Taxonomy of wild pigs (*Sus*) of the Philippines. *Zoological Journal of the*  
606 *Linnaean Society*. 1997;120: 163–191.
- 607 17. Li KY, Li KT, Yang CH, Hwang MH, Chang SW, Lin SM, Wu HJ, Basilio EB, Vega  
608 RSA, Laude RP, Ju YT. Insular East Asia pig dispersal and vicariance inferred from  
609 Asian wild boar genetic evidence. *Journal of Animal Science*. 2017;95(4): 1451-1466.
- 610 18. Bellwood P and Dizon E. The Batanes Archaeological Project and the 'Out of Taiwan'  
611 hypothesis for Austronesian dispersal. *Journal of Austronesian Studies*. 2005;1(1): 1–  
612 32.
- 613 19. Bellwood P and Dizon E. The chronology of Batanes prehistory. In P. Bellwood, and  
614 E. Dizon (eds), 4000 Years of Migration and Cultural Exchange: Archaeology in the  
615 Batanes Islands, Northern Philippines. *Terra Australis* 40. Canberra: ANU E Press;  
616 2013. pp. 67-76.
- 617 20. Oppenheimer S. *Eden in the East*. Phoenix: Orion; 1999.
- 618 21. Solheim WG. *Archaeology and culture in Southeast Asia: unravelling the Nusantau*.  
619 *Quezon City: University of the Philippines Press*; 2006.
- 620 22. Larson G, Albarella U, Dobney K, Rowley-conwy P. Current views on *Sus*  
621 phylogeography and pig domestication as seen through modern mtDNA studies, in U.  
622 Alberella, K. Dobney, A. Ervynck & P. Rowley-conwy (eds.) *Pigs and humans: 10,000*  
623 *years of interaction*. Oxford: Oxford University Press; 2007b. pp. 30-41.
- 624 23. Larson G, Cucchi T, Fujita M, Smith EM, Robins J, Anderson A, Rolett B, Spriggs M,  
625 Dolman G, Kim TH, Thuy NTD, Randi E, Doherty M, Due RA, Bollt R, Djubiantono  
626 T, Griffin B, Intoh M, Keane E, Kirch P, Li KT, Morwood M, Pedrina LM, Piper PJ,  
627 Rabell RJ, Shooter P, den Bergh GV, West E, Wickler S, Yuan J, Cooper A, Dobney  
628 K. Phylogeny and ancient DNA of *Sus* provides insights into Neolithic expansion in



- 629 island Southeast Asia and Oceania. *Proceedings of the National Academy of Sciences*.  
630 2007a;104: 4834–4839.
- 631 24. Dobney K, Cucchi T, Larson G. The pigs of Island Southeast Asia and the Pacific: New  
632 evidence for taxonomic status and human-mediated dispersal. *Asian*  
633 *Perspectives*. 2008;47(1): 59-74.
- 634 25. Larson G, Liu R, Zhao X, Yuan J, Fuller D, Barton L, Dobney K, Fan Q, Gu Z, Liu  
635 XH, Luo Y, Lv P, Andersson L, and Li N. Patterns of East Asian pig domestication,  
636 migration, and turnover revealed by modern and ancient DNA. *Proceedings of the*  
637 *National Academy of Sciences*. 2010;107: 7686–7691.
- 638 26. Nishibori M, Hanazono M, Yamamoto Y, Tsudzuki M, Yasue H. Complete nucleotide  
639 sequence of mitochondrial DNA in White Leghorn and White Plymouth Rock chickens.  
640 *Animal Science Journal*. 2003;74(5): 437-439.
- 641 27. Nishibori M, Hayashi T, Tsudzuki M, Yamamoto Y, Yasue H. Complete sequence of  
642 the Japanese quail (*Coturnix japonica*) mitochondrial genome and its genetic  
643 relationship with related species. *Animal Genetics*. 2001;32(6): 380-385.
- 644 28. Tamura K, Stecher G, Peterson D, Filipski A, Kumar S. MEGA6: Molecular  
645 evolutionary genetics analysis version 6.0. *Molecular Biology and Evolution*.  
646 2013;30(12): 2725-2729.
- 647 29. Librado P, Rozas J. A software for comprehensive analysis for DNA polymorphism  
648 data. *Bioinformatics*. 2009;25: 1450-1452.
- 649 30. Excoffier L, Laval G, Schneider S. Arlequin ver. 3.0. An integrated software package  
650 for population genetics data analysis. *Evolutionary Bioinformatics Online*. 2005;1: 47–  
651 50.
- 652 31. Excoffier L, Smouse P, Quattro J. Analysis of molecular variance inferred from  
653 metric distances among DNA haplotypes: Application to human mitochondrial DNA  
654 restriction data. *Genetics*. 1992;131: 479–491.
- 655 32. Guindon S, Dufayard JF, Lefort V, Anisimova M, Hordijk W, Gascuel O. New  
656 algorithm and methods to estimate Maximum-Likelihood Phylogenies: Assessing the  
657 performance of PhyML 3.0. *Systematic Biology*. 2010;59(3): 307-321.
- 658 33. Bandelt HJ, Forster P, Sykes BC, Richards MB. Mitochondrial portraits of human  
659 populations. *Genetics*. 1995;141: 743–753.
- 660 34. Bandelt HJ, Forster P, Rohlf A. Median-joining networks for inferring intraspecific  
661 phylogenies. *Molecular Biology and Evolution*. 1999;16: 37–48.
- 662 35. Rogers AR, Harpending H. Population growth makes waves in the distribution of  
663 pairwise genetic differences. *Molecular Biology and Evolution*. 1992;9: 552–569.
- 664 36. Harpending HC. Signature of ancient population growth in a low-resolution  
665 mitochondrial DNA mismatch distribution. *Human Biology*. 1994;66: 591–600.
- 666 37. Rogers AR. Genetic evidence for a Pleistocene population explosion. *Evolution*.  
667 1995;49: 608–615.
- 668 38. Fu YX. Statistical tests of neutrality of mutations against population growth,  
669 hitchhiking and background selection. *Genetics*. 1997;147(2): 915–925.
- 670 39. Ramos-Onsins SE, Rozas J. Statistical properties of the new neutrality test against  
671 population growth. *Molecular Biology and Evolution*. 2002;19: 2092–2100.

- 672 40. Drummond AJ, Rambaut A, Shapiro B, Pybus OG. Bayesian coalescent inference of  
673 past population dynamics from molecular sequences. *Molecular Biology and Evolution*.  
674 2005. 22: 1185–1192.
- 675 41. Hasegawa M, Kishino H, Yano T. Dating of the human-ape splitting by a molecular  
676 clock of mitochondrial DNA. *Journal of Molecular Evolution*. 1985;22: 160–174.
- 677 42. Bouckaert R, Heled J, Kühnert D, Vaughan T, Wu CH, Xie D, Suchard MA, Rambaut  
678 A, Drummond AJ. BEAST 2: A software platform for Bayesian evolutionary analysis.  
679 *PLoS Computational Biology*. 2014;10: e1003537.
- 680 43. Pesole G, Gissi C, De Chirico A, Saccone C. Nucleotide substitution rate of mammalian  
681 mitochondrial genomes. *Journal of Molecular Evolution*. 1999;48: 427–433.
- 682 44. Tanaka K, Iwaki Y, Takizawa T, Dorji T, Tshering G, Kurosawa Y, Maeda H, Mannen  
683 H, Nomura K, Dang VB, Chhum-Phith LC, Bouahom B, Yamamoto Y, Dang T,  
684 Namikawa T. Mitochondrial diversity of native pigs in the mainland South and South-  
685 east Asian countries and its relationships between local wild boars. *Animal Science*  
686 *Journal*. 2008;79: 417–434.
- 687 45. Okumura N, Kurosawa Y, Kobayashi E, Watanabe T, Ishiguro N, Yasue H, Mitsuhashi  
688 T. Genetic relationship amongst the major non-coding regions of mitochondrial DNAs  
689 in wild boars and several breeds of domesticated pigs. *Animal Genetics*. 2001;32: 139–  
690 147.
- 691 46. Fang M, Andersson L. Mitochondrial diversity in European and Chinese pigs is  
692 consistent with population expansions that occurred prior to domestication.  
693 *Proceedings Biological Sciences of the Royal Society*. 2006;273: 1803–1810.
- 694 47. Bellwood P. A hypothesis for Austronesian origins. *Asian Perspectives*. 1985;26: 107–  
695 118.
- 696 48. Ingicco T, Piper PJ, Amano N, Paz VJ, Pawlik AF. Biometric differentiation of wild  
697 Philippine pigs from introduced *Sus scrofa* in modern and archaeological assemblages.  
698 *International Journal of Osteoarchaeology*. 2017;27: 768–784.
- 699 49. Larena M, Quinto FS, Sjödin P, McKenna J, Ebeo C, Reyes R, Casel O, Huang J-  
700 Y, Hagada KP, Guilay D, Reyes J, Allian FP, Mori V, Azarcon LH, Manera  
701 A, Terando C, Jamero L, Sireg G, Manginsay-Tremedal R, Labos MS, Vilar  
702 RH, Latiph A, Saway RS, Marte E, Magbanua P, Morales A, Java I, Reveche  
703 R, Barrios B, Burton E, Salon JC, Kels MJT, Albano A, Cruz-Angeles RB, Molanida  
704 E, Granehall L, Vicente M, Edlund H, Loo JH, Ho TYW, Reid L, Malmström  
705 H, Schlebusch C, Lambeck K, Endicott P, Jakobsson M. Multiple migrations to the  
706 Philippines during the last 50,000 years. *Proceedings of the National Academy of*  
707 *Sciences, USA*. 2021;118(13): e2026132118.
- 708 50. Frantz LAF, Schraiber JG, Madsen O, Megens HJ, Bosse M, Paudel Y, et al. Genome  
709 sequencing reveals fine scale diversification and reticulation history during speciation  
710 in *Sus*. *Genome Biology*. 2013;14(9): R107.
- 711 51. Gongora J, Fleming P, Spencer PBS, Mason R, Garkavenko O, Meyer JN,  
712 Droegemueller C, Lee JH, Moran C: Phylogenetic relationships of australian and new  
713 zealand feral pigs assessed by mitochondrial control region sequence and nuclear gpi  
714 genotype. *Molecular Phylogenetics and Evolution*. 2004;33: 339-348.

- 715 52. Thomson VA, Lebrasseur O, Austin JJ, Hunt TL, Burney DA, Denham T, Rawlence  
716 NJ, Wood JR, Gongora J, Girdland Flink L, Linderholm A, Dobney K, Larson G,  
717 Cooper A. Using ancient DNA to study the origins and dispersal of ancestral Polynesian  
718 chickens across the Pacific. *Proceedings of the National Academy of Sciences, USA*.  
719 2014;1: 111(13):4826-31.
- 720 53. Naderi S, Rezaei H-R, Taberlet P, Zundel S, Rafat S-A, Naghash H-R, Elbarody MAA,  
721 Ertugrul O, Pompanon F, for the Econogene Consortium. Large-scale mitochondrial  
722 DNA analysis of the domestic goat reveals six haplogroups with high diversity. *PLoS*  
723 *ONE*. 2007;2(10): e1012.
- 724 54. Scott WH. Sixteenth-century Visayan food and farming. *Philippine Quarterly of*  
725 *Culture and Society*. 1990;18: 291-293.
- 726 55. Fox RB. The Archeological record of Chinese influences in the Philippines. *Philippine*  
727 *Studies*. 1967;15(1):41-62.
- 728 56. Penalba FF. Philippine native pigs: Performance and potential. *Animal Production*  
729 *Technology*. 1993;8(1): 2-7.
- 730 57. Bondoc OL. Animal Breeding: Principles and Practice in the Philippine Context.  
731 Diliman, Quezon City: *University of the Philippines Press*; 2008.
- 732 58. Watanabe T, Hayashi Y, Ogasawara N, Tomoita T. Polymorphism of mitochondrial-  
733 DNA in pigs based on restriction endonuclease cleavage patterns. *Biochemical*  
734 *Genetics*. 1985;23: 105–113.
- 735 59. Okumura N, Ishiguro N, Nakano M, Hirai K, Matsui A, Sahara N. Geographic  
736 population structure and sequence divergence in the mitochondrial DNA control region  
737 of the Japanese wild boar (*Sus scrofa leucomystax*), with reference to those of domestic  
738 pigs. *Biochemical Genetics*. 1996;34: 179–189.
- 739 60. Groenen M, Archibald A, Uenishi H, et al. Analyses of pig genomes provide insight  
740 into porcine demography and evolution. *Nature*. 2012;491: 393–398.
- 741 61. Bianco E, Soto HW, Vargas L, Pérez-Enciso M. The chimerical genome of Isla del  
742 Coco feral pigs (Costa Rica), an isolated population since 1793 but with remarkable  
743 levels of diversity. *Molecular Ecology*. 2015;24: 2364-2378.
- 744 62. Wang C, Chen YS, Han JL, MD, Li XJ, Liu X-H. Mitochondrial DNA diversity and  
745 origin of indigenous pigs in South China and their contribution to western modern pig  
746 breeds. *Journal of Integrative Agriculture*. 2019;18(10): 2338–2350.
- 747 63. Groves CP. Pigs east of the Wallace Line. *Journal de la Soci'et'e des Oc'eanistes*.  
748 1983;39: 105-119.
- 749 64. Baker PA, Fritz SC, Dick CW, Eckert AJ, Horton BK, Manzoni S, Ribas CC, Garzione  
750 CN, Battisti, DS. The emerging field of geogenomics: Constraining geological  
751 problems with genetic data. *Earth-Science Reviews*. 2014;135: 38-47.
- 752 65. Dorcus KM, Steffen W, Armin OS, Annett W, Christian R, Henner S. Genetic  
753 diversity in global chicken breeds as a function of genetic distance to the wild  
754 populations. 2020. Preprint; <https://doi.org/10.1101/2020.01.29.924696>.
- 755 66. Sulandari S, Zein MA, Sartika T. Molecular characterization of Indonesian indigenous  
756 chickens based on mitochondrial DNA displacement (D) -loop sequences. *Hayati*  
757 *Journal of Bioscience*. 2008;15: 145-154.

- 758 67. Wu GS, Yao YG, Qu KX, Ding ZL, Li H, Palanichamy MG, Duan ZY, Chen YS, Zhang  
759 YP. Population phylogenomic analysis of mitochondrial DNA in wild boars and  
760 domestic pigs revealed multiple domestication events in East Asia. *Genome Biology*.  
761 2007b;8: R245.
- 762 68. Scandura M, Iacolina L, Apollonio M. Genetic diversity in the European wild boar *Sus*  
763 *scrofa*: Phylogeography, population structure and wild x domestic hybridization.  
764 *Mammal Review*. 2011;41(2): 125–137.
- 765 69. Bruford M, Bradley D, Luikart G. DNA markers reveal the complexity of livestock  
766 domestication. *Nature Reviews Genetics*. 2003;4: 900–910.
- 767 70. Tajima F. The effect of change in population size on DNA polymorphism. *Genetics*.  
768 1989;123: 597–601.
- 769 71. Fauvelot C, Bernardi G, Planes S. Reductions in the mitochondrial DNA diversity of  
770 coral reef fish provide evidence of population bottlenecks resulting from Holocene sea-  
771 level change. *Evolution*. 2003;57: 1571-1583.
- 772 72. Martel C, Viard F, Bourguet D, Garcia-Meunier P. Invasion by the marine gastropod  
773 *Ocenebrellus inornatus* in France. II. Expansion along the Atlantic coast. *Marine*  
774 *Ecology Progress Series*. 2004;273: 163–172.
- 775 73. Hewitt GM. The genetic legacy of the quaternary ice ages. *Nature*. 2000;405: 907–913.
- 776 74. Provan J, Bennett KD. Phylogeographic insights into cryptic glacial refugia. *Trends in*  
777 *Ecology and Evolution*. 2008;23: 564–571.
- 778 75. Deli T, Kiel C, Schubart CD. Phylogeographic and evolutionary history analyses of the  
779 warty crab *Eriphia verrucosa* (Decapoda, Brachyura, Eriphiidae) unveil genetic  
780 imprints of a late Pleistocene vicariant event across the Gibraltar Strait, erased by  
781 postglacial expansion and admixture among refugial lineages. *BMC Evolutionary*  
782 *Biology*. 2019;19: 105.
- 783 76. Lyrholm T, Leimar O, Gyllensten U. Low diversity and biased substitution patterns in  
784 the mitochondrial DNA control region of sperm whales: Implications for estimates of  
785 time since common ancestry. *Molecular Biology and Evolution*. 1996;13: 1318–1326.
- 786 77. Sanchez G, Kawai K, Yamashiro C, Fujita R, Wakabayashi T, Sakai M, Umino T.  
787 Patterns of mitochondrial and microsatellite DNA markers describe historical and  
788 contemporary dynamics of the Humboldt squid *Dosidiscus gigas* in the Eastern Pacific.  
789 *Reviews in Fish Biology and Fisheries*. 2020;30: 519–533.
- 790 78. Veličković N, Ferreira E, Djan M. Demographic history, current expansion and future  
791 management challenges of wild boar populations in the Balkans and Europe. *Heredity*.  
792 2016;117: 348–357.
- 793 79. Bird MI, Taylor D, Hunt C. Palaeoenvironments of insular Southeast Asia during the  
794 Last Glacial Period: a savanna corridor in Sundaland? *Quaternary Science Review*.  
795 2005;24: 2228-2242.
- 796 80. Wurster CM, Bird MI, Bull ID, Creed F, Bryant C, Dungait JAJ, Paz V. Forest  
797 contraction in north equatorial Southeast Asia during the Last Glacial Period.  
798 *Proceedings of the National Academy of Sciences*. 2010;107: 15508-15511.  
799  
800

## 801 **Supporting information**

802 **S1 Fig. Variable positions among haplotypes of the partial mitochondrial DNA control**  
803 **region (about 510 bp) found in this study.** Dots (.) indicates matches with the nucleotide  
804 sequence GenBank accession number AB041480 (Main cluster of Asian origin); minus (-)  
805 represents gaps. PWP=Philippine wild pigs; D7=previously described as MTSEA haplogroup.  
806 Nucleotide positions are numbered according to our sequence alignment.

807

808 **S2 Fig. Proposed route of dispersal and human-mediated translocation of pigs in the**  
809 **Philippines.**

810

811 **S1 Table. List of samples used in the study.**

812 **S2 Table. Newly generated Philippine pig haplotypes and the publicly available sequences**  
813 **of pigs found in the mainland Southeast Asia**

814

815 **S3 Table. Publicly available global pig haplotype sequences used to infer phylogenetic**  
816 **and network haplotypes analysis**



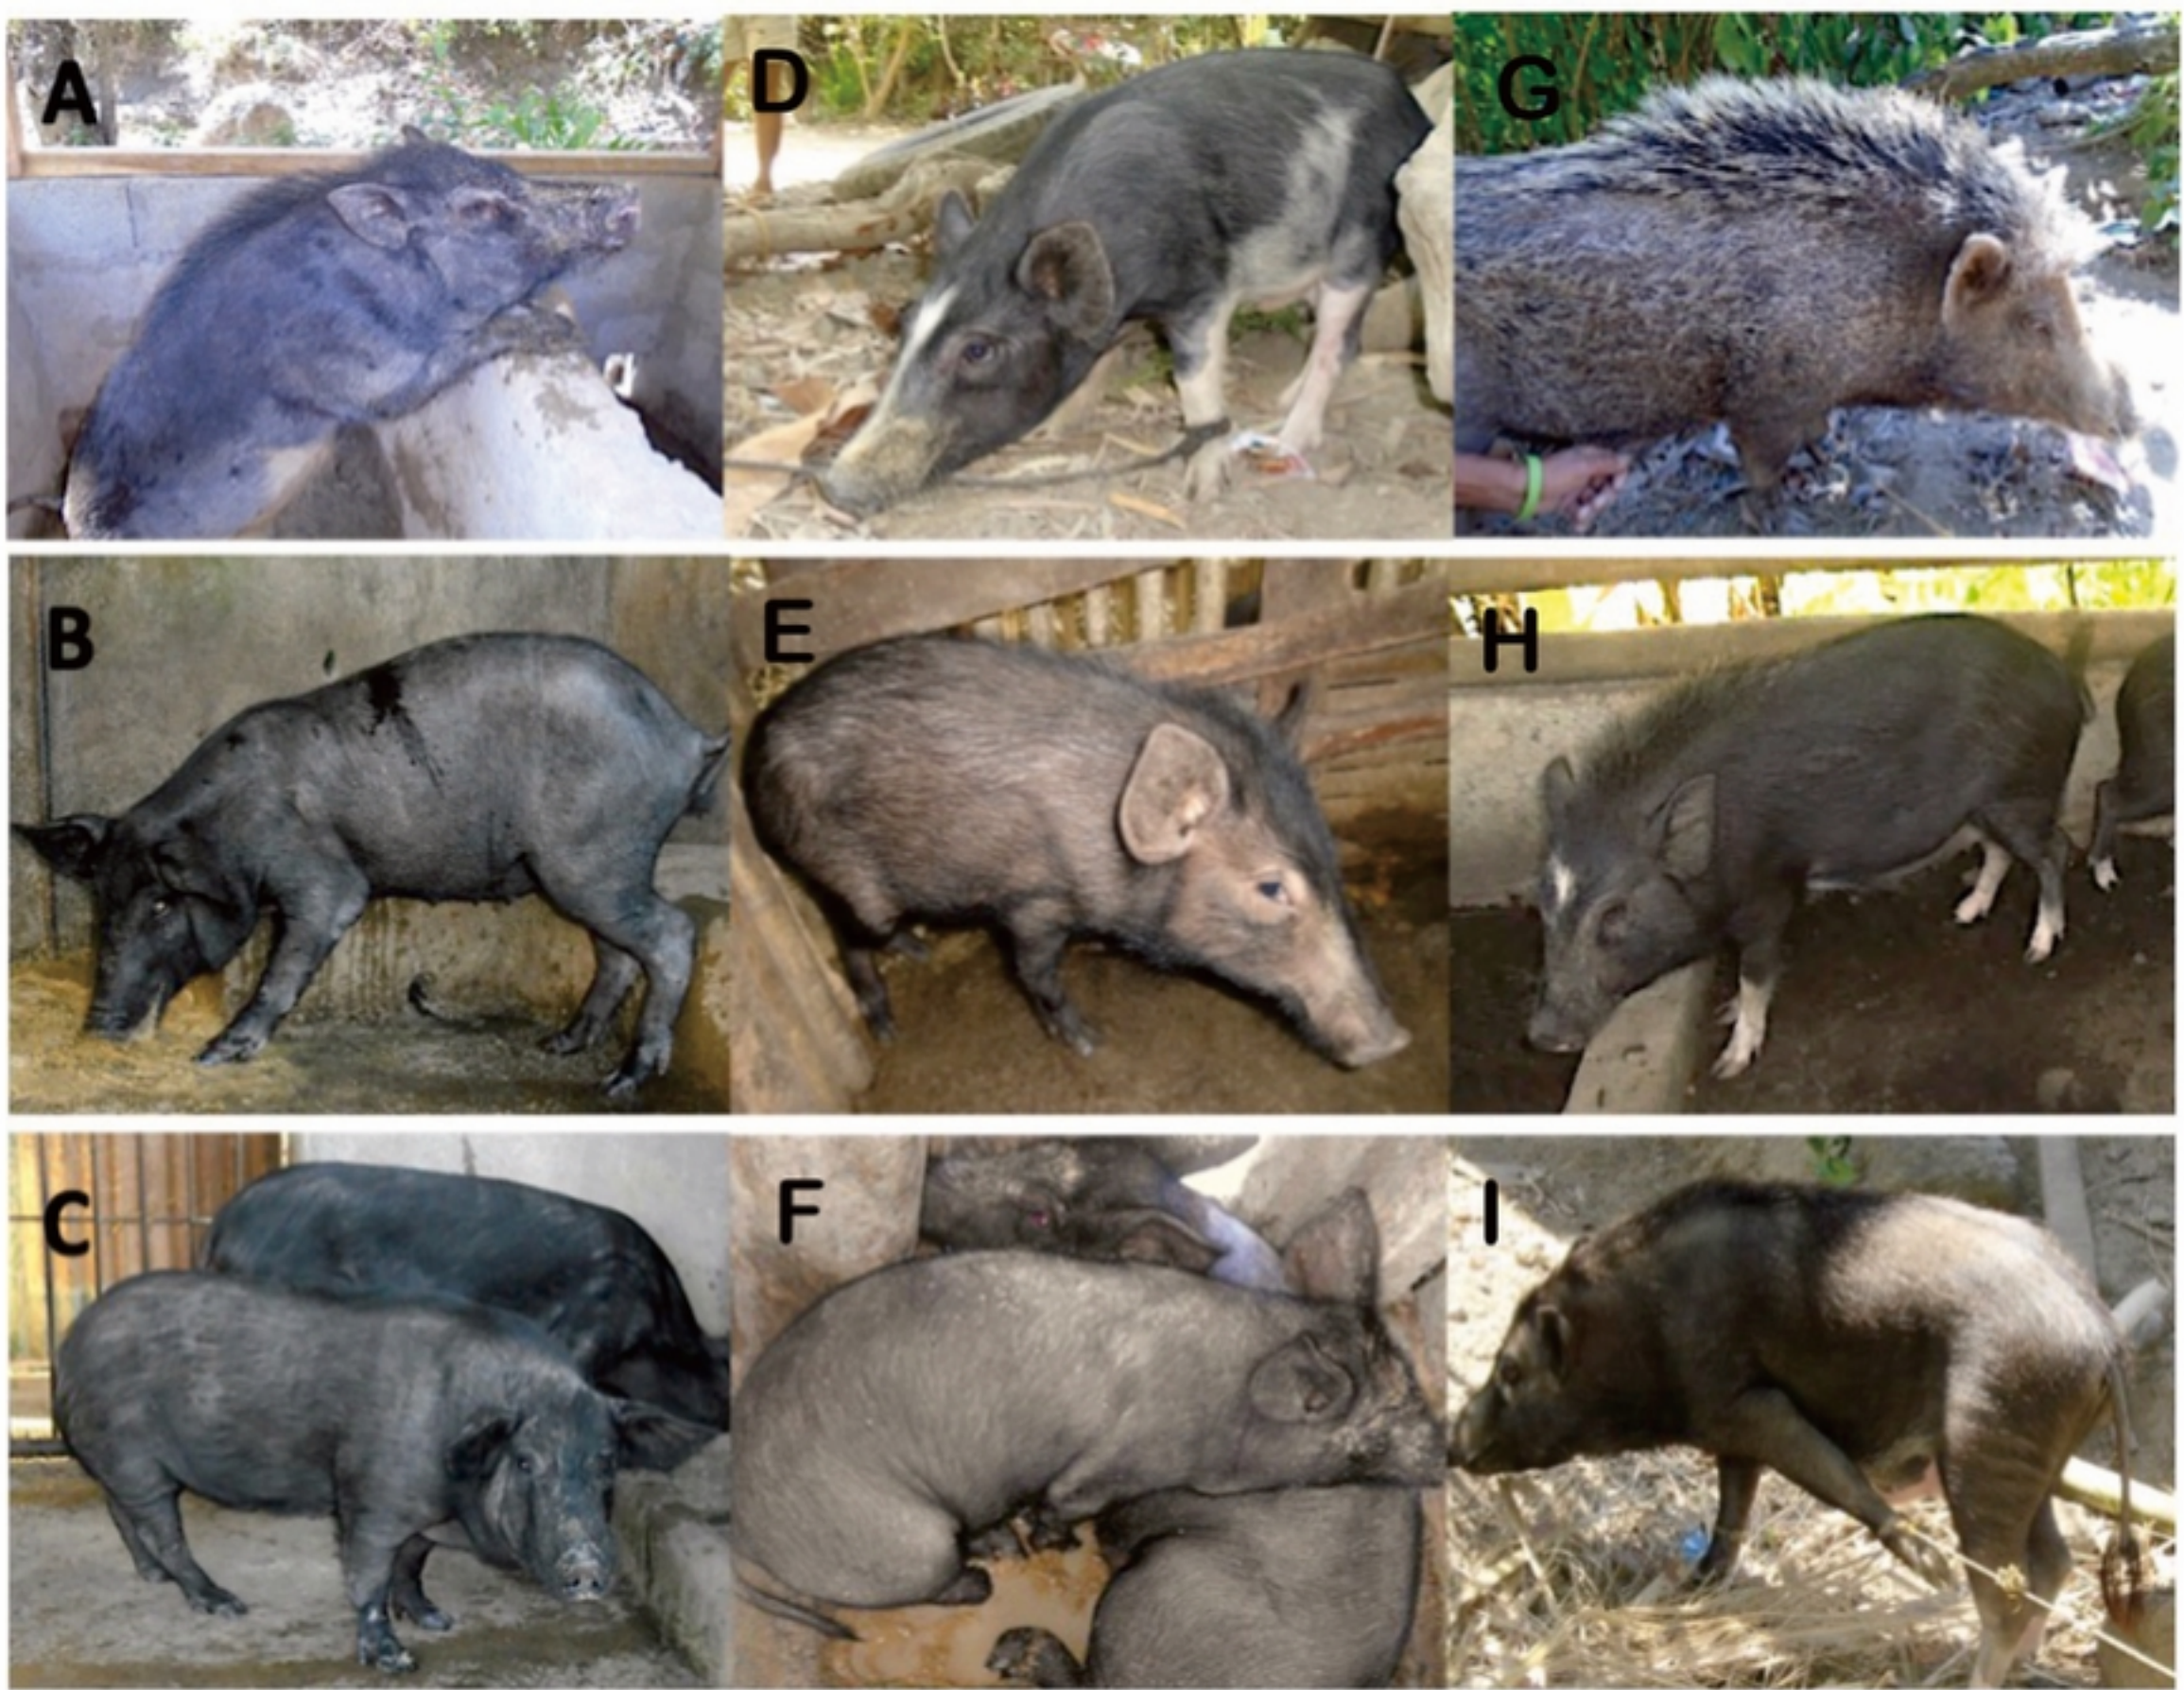

Figure



bioRxiv preprint doi: <https://doi.org/10.1101/2021.07.23.453525>; this version posted July 23, 2021. The copyright holder for this preprint (which was not certified by peer review) is the author/funder, who has granted bioRxiv a license to display the preprint in perpetuity. It is made available under aCC-BY 4.0 International license.

D2 ■  
 D7 ■  
 D4 ■  
 D1 ■  
 D3 ■  
 Lanyu ■  
 Ryukyu WB ■  
 D5 ■  
 D6 ■  
 Cambodian WB ■  
 Philippine WP ■

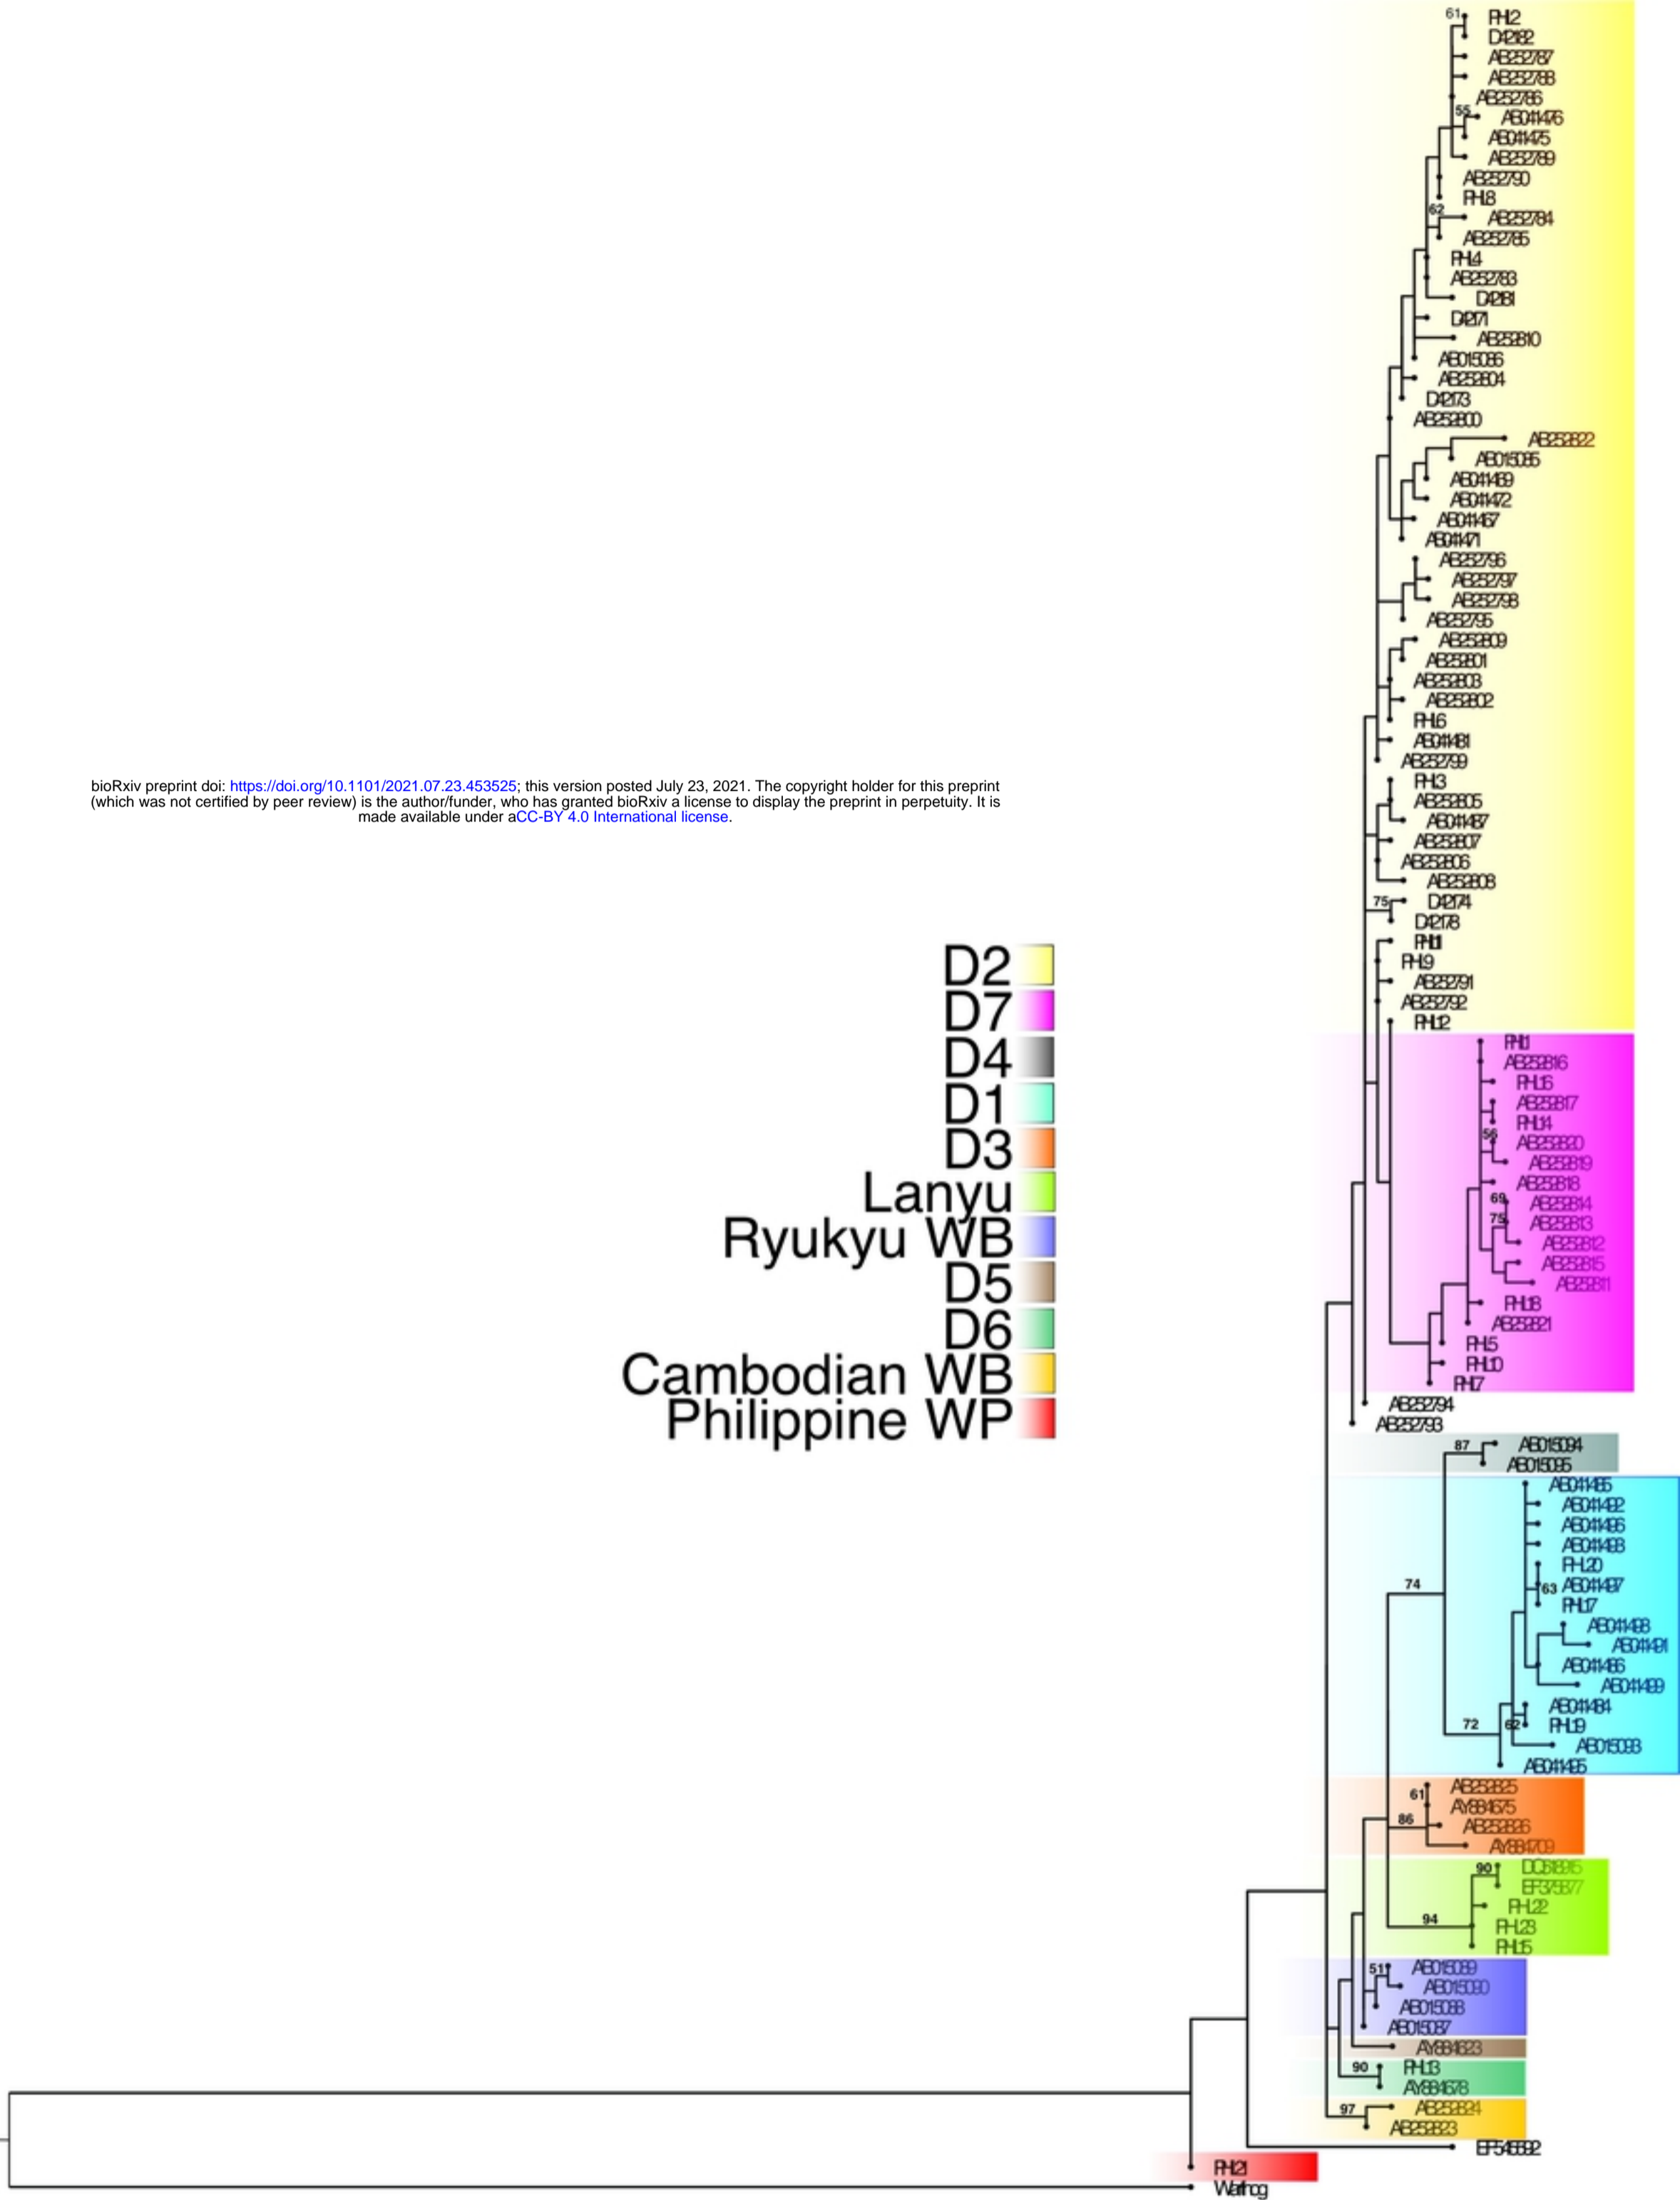

0.06

Figure

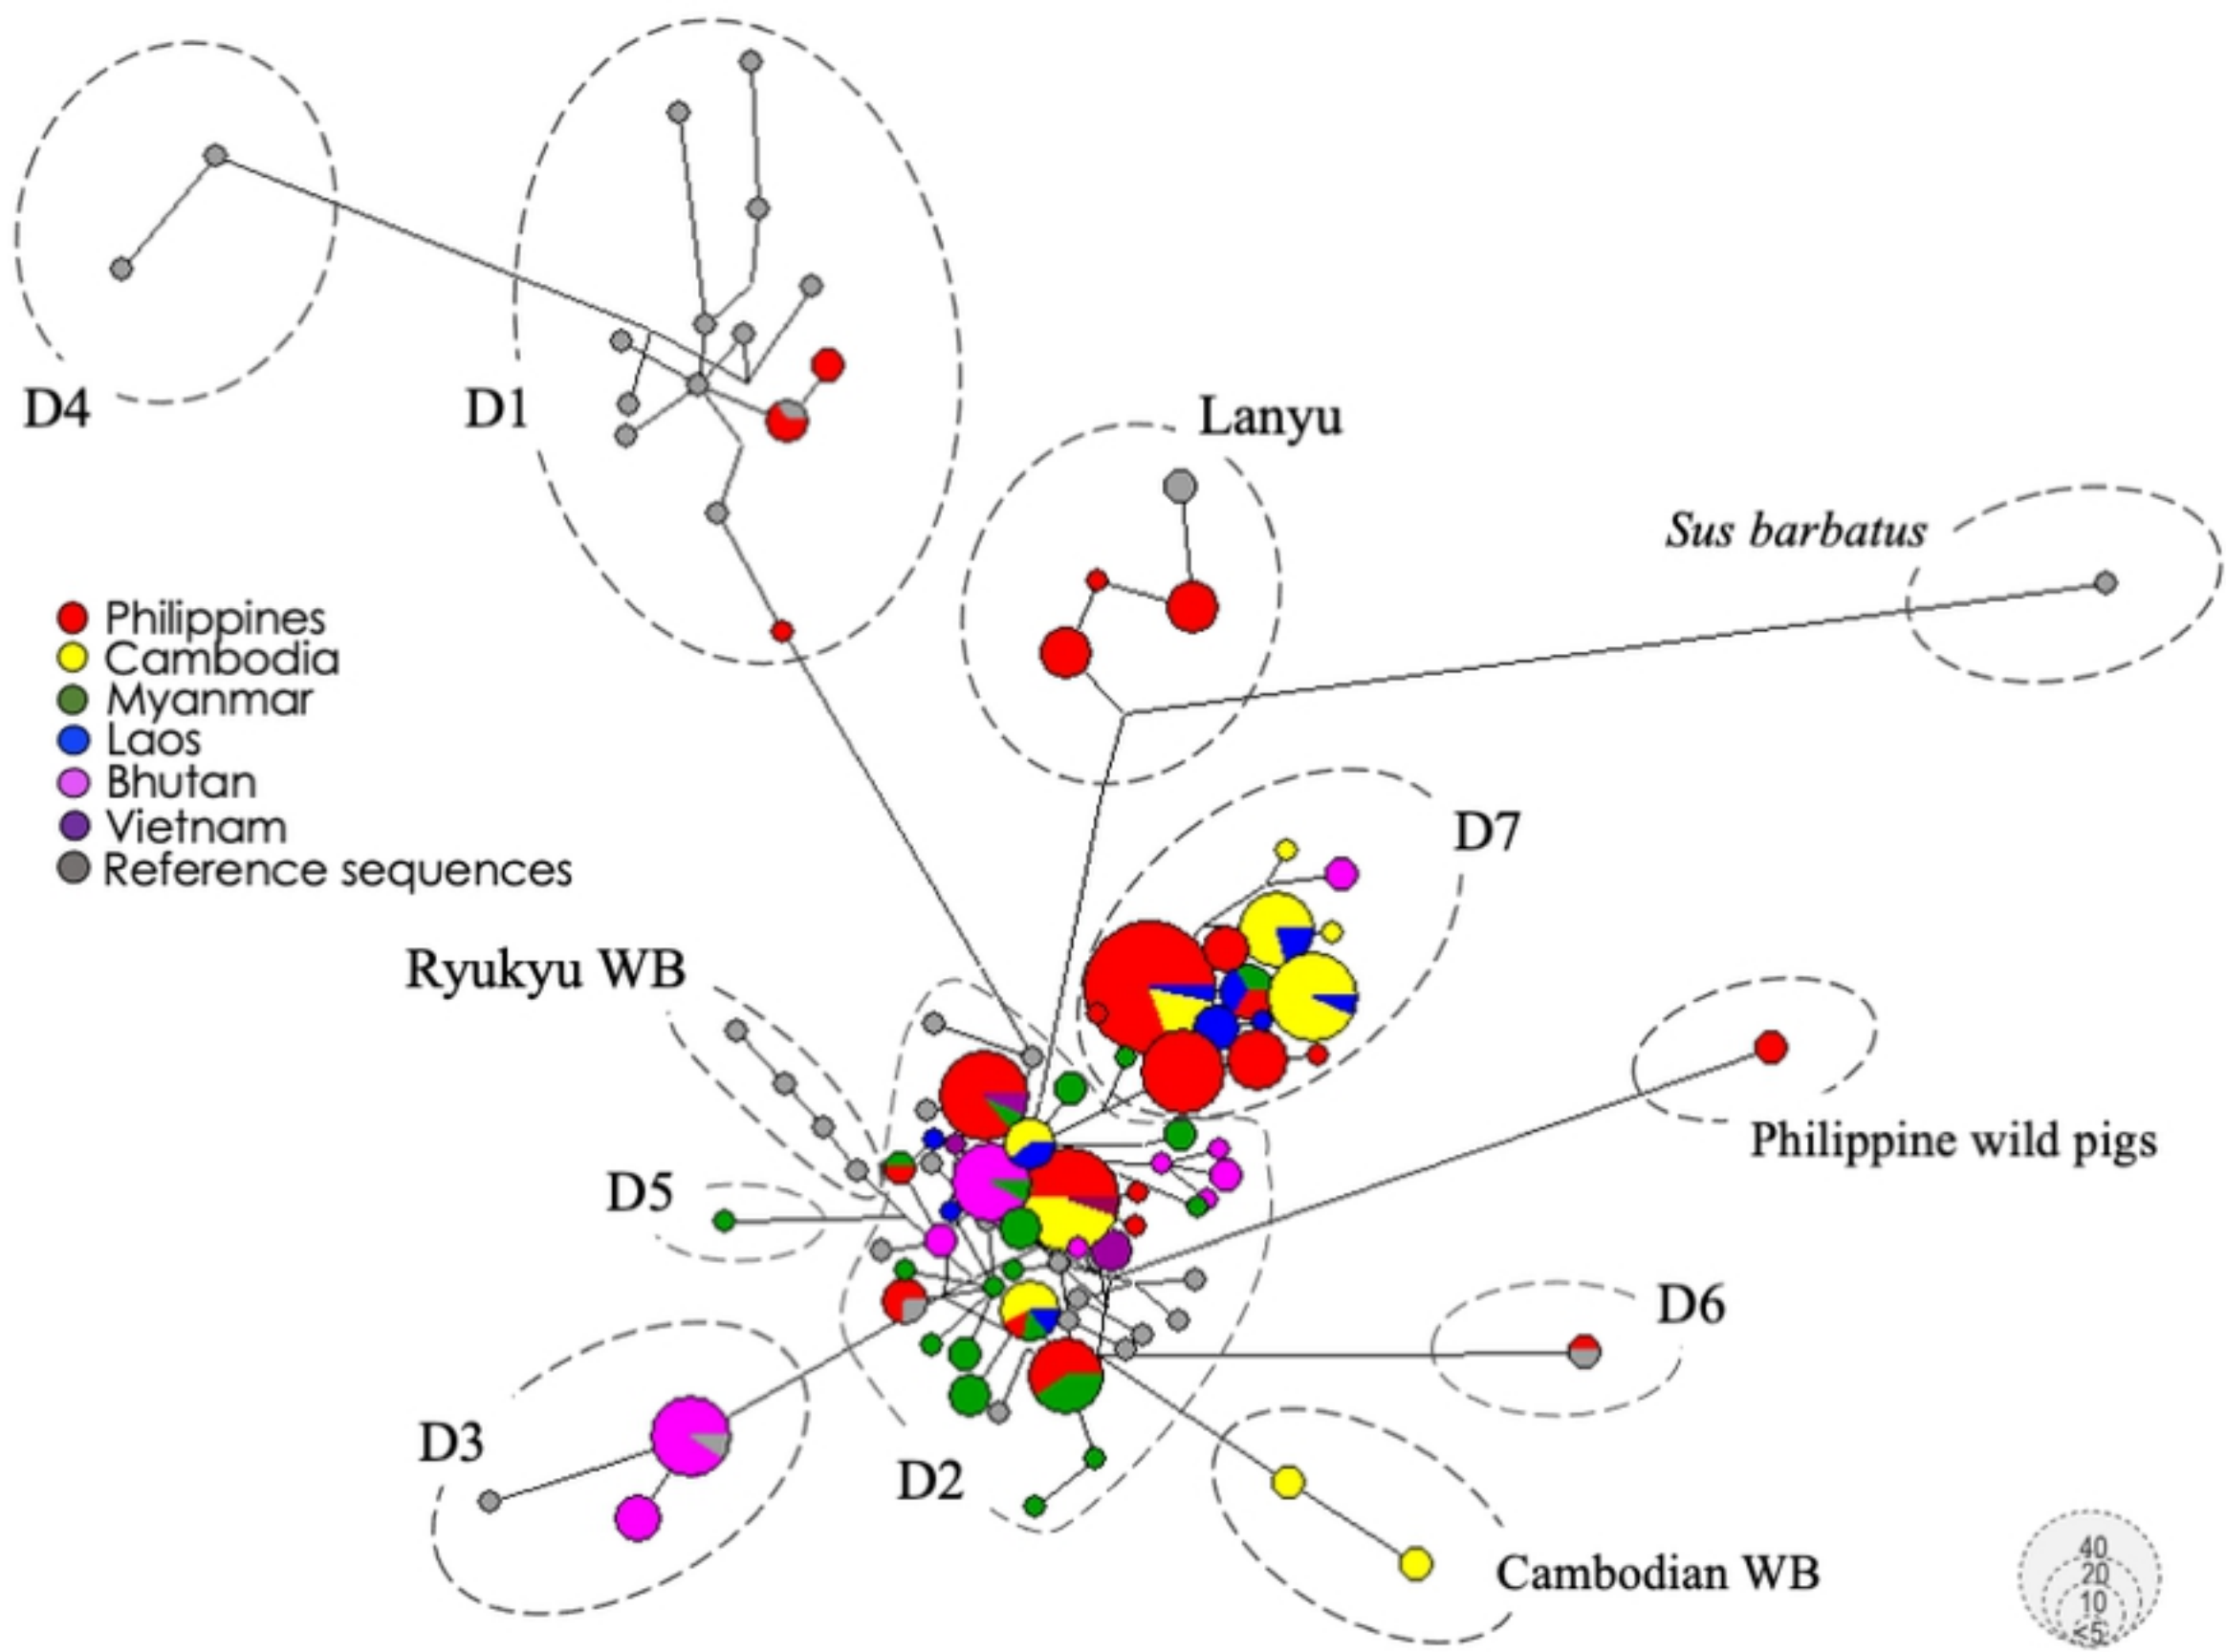

Figure



## A) PHILIPPINES

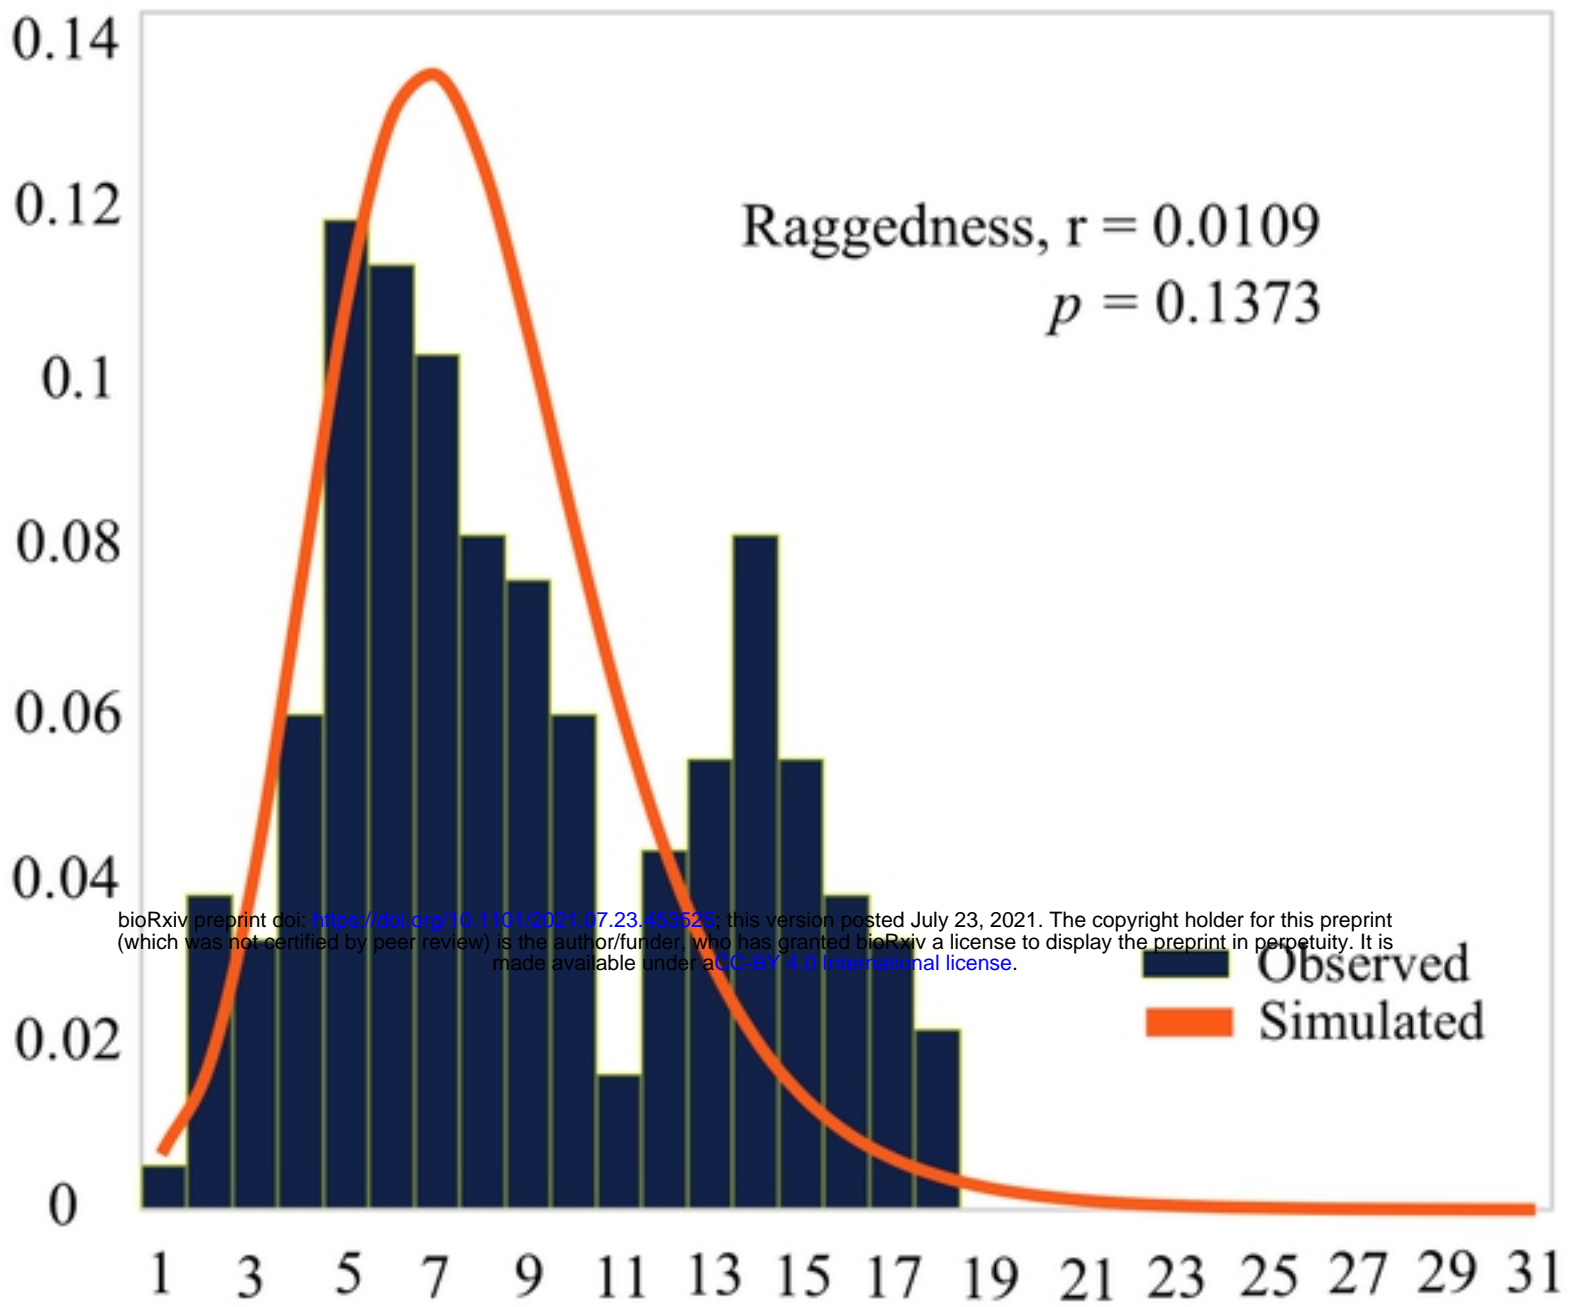

## B) MAINLAND SEA COMBINED

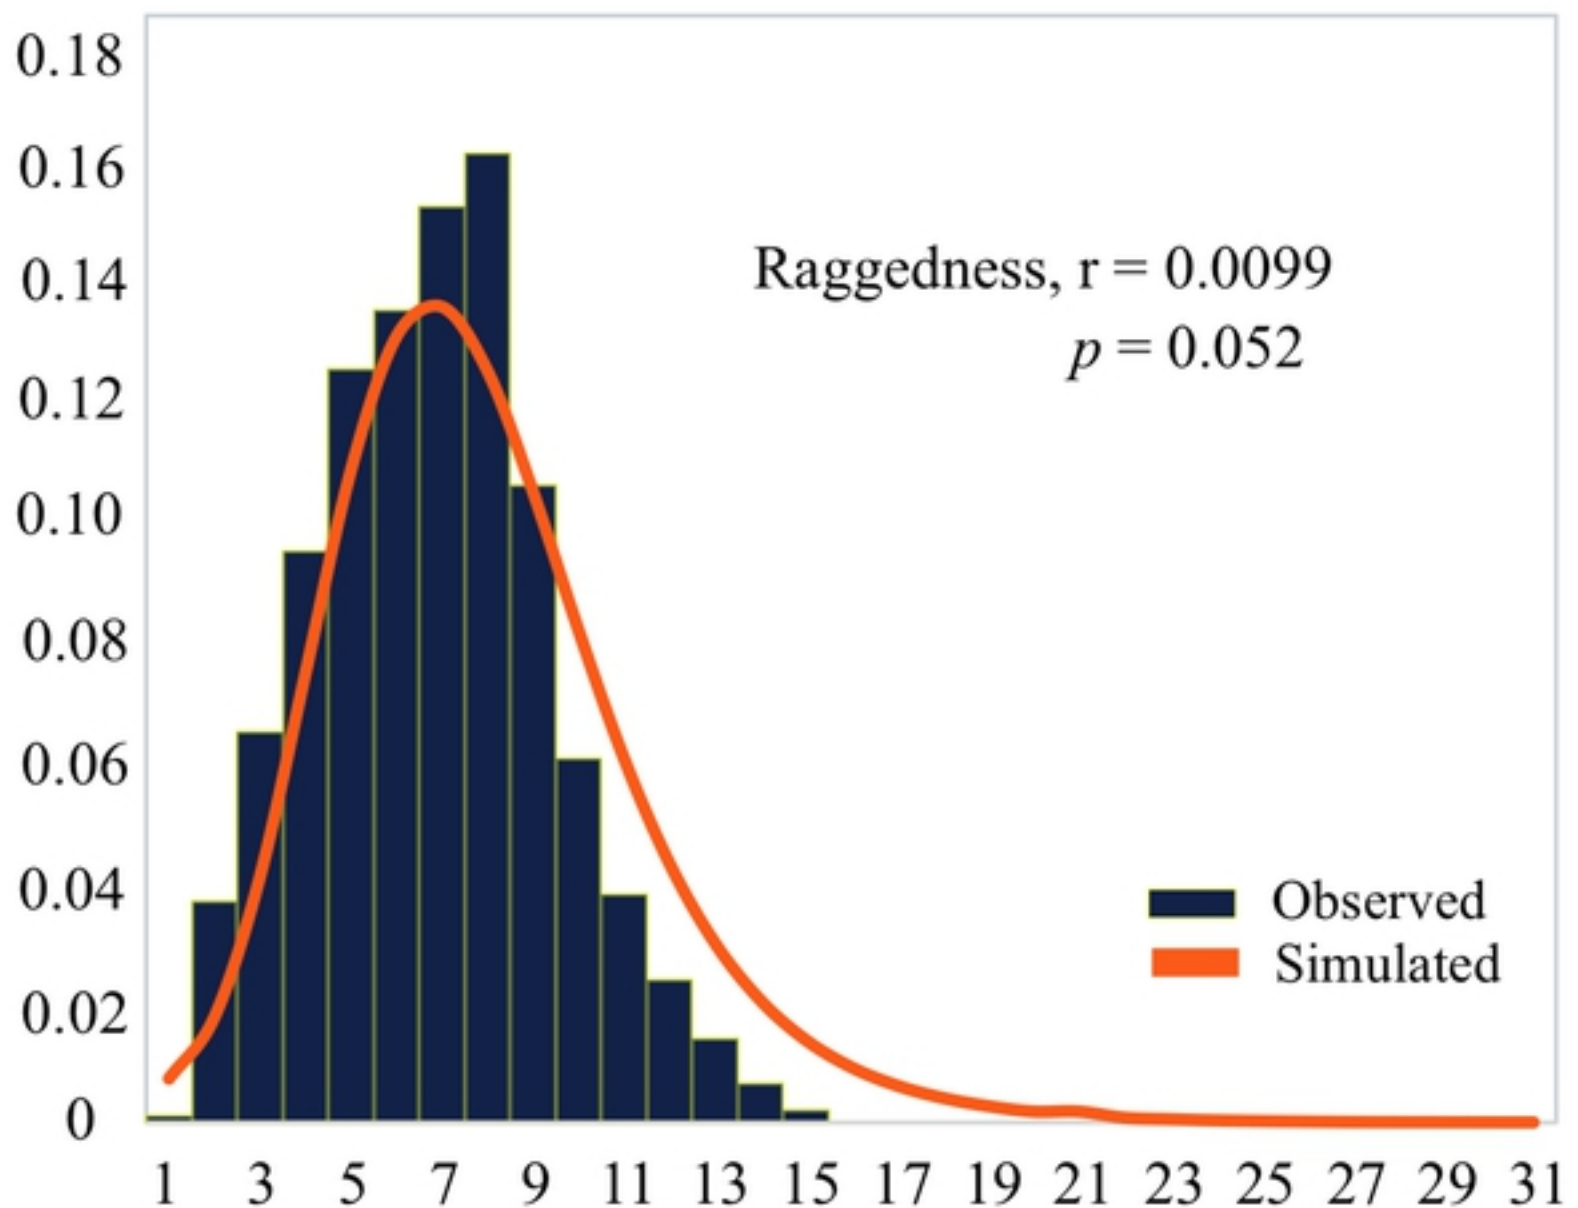

Figure

## Bhutan

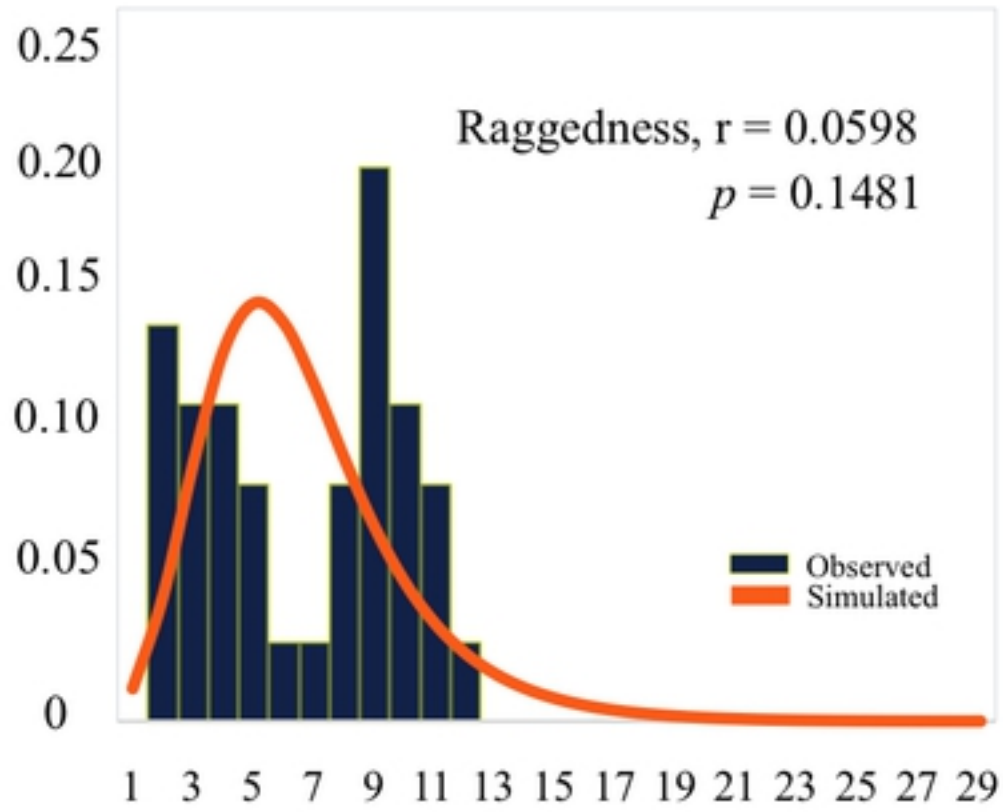

## Myanmar

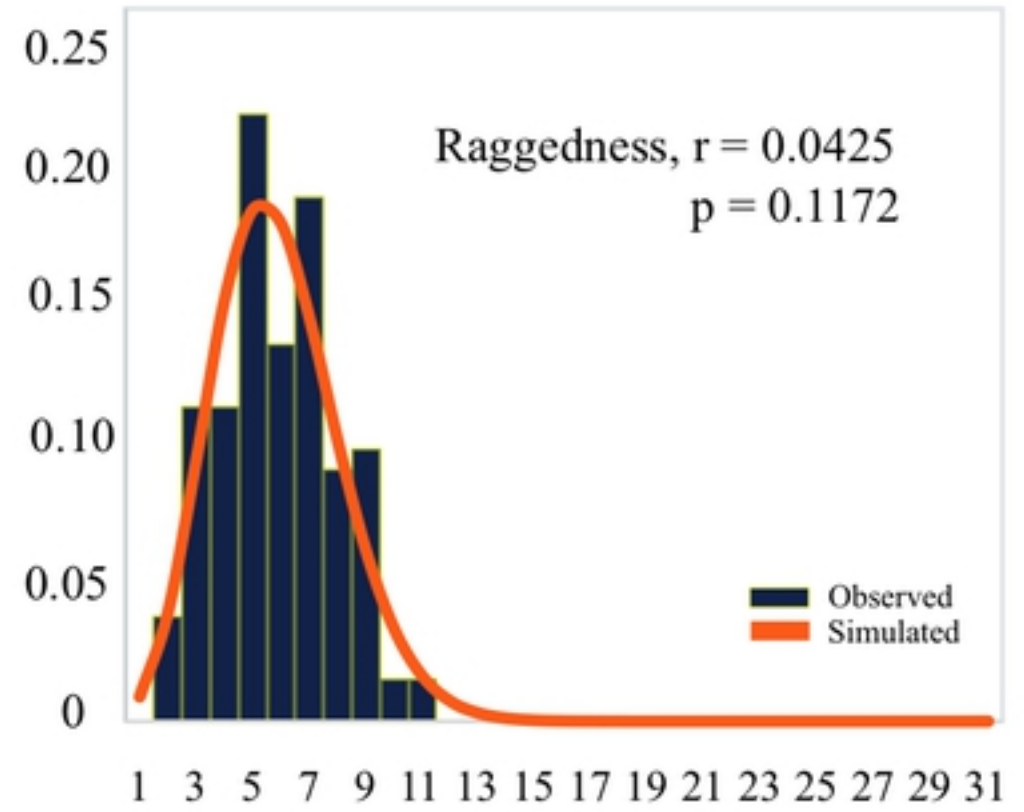

bioRxiv preprint doi: <https://doi.org/10.1101/2021.07.23.453525>; this version posted July 23, 2021. The copyright holder for this preprint (which was not certified by peer review) is the author/funder, who has granted bioRxiv a license to display the preprint in perpetuity. It is made available under aCC-BY 4.0 International license.

## Laos

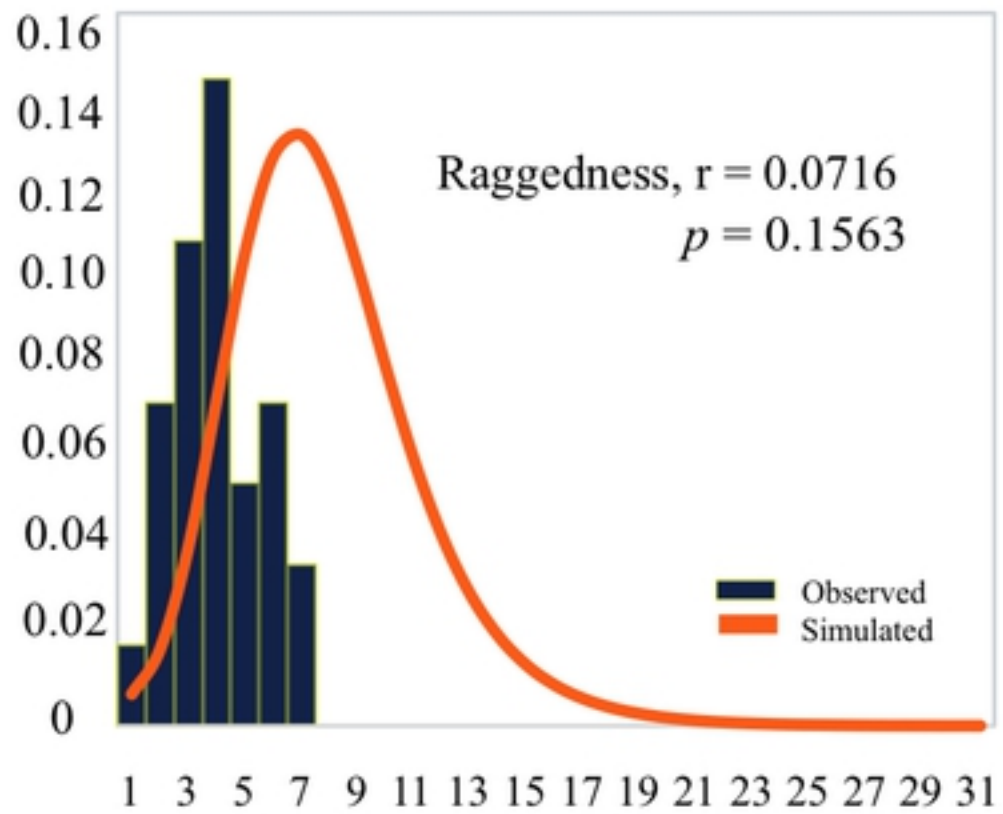

## Cambodia

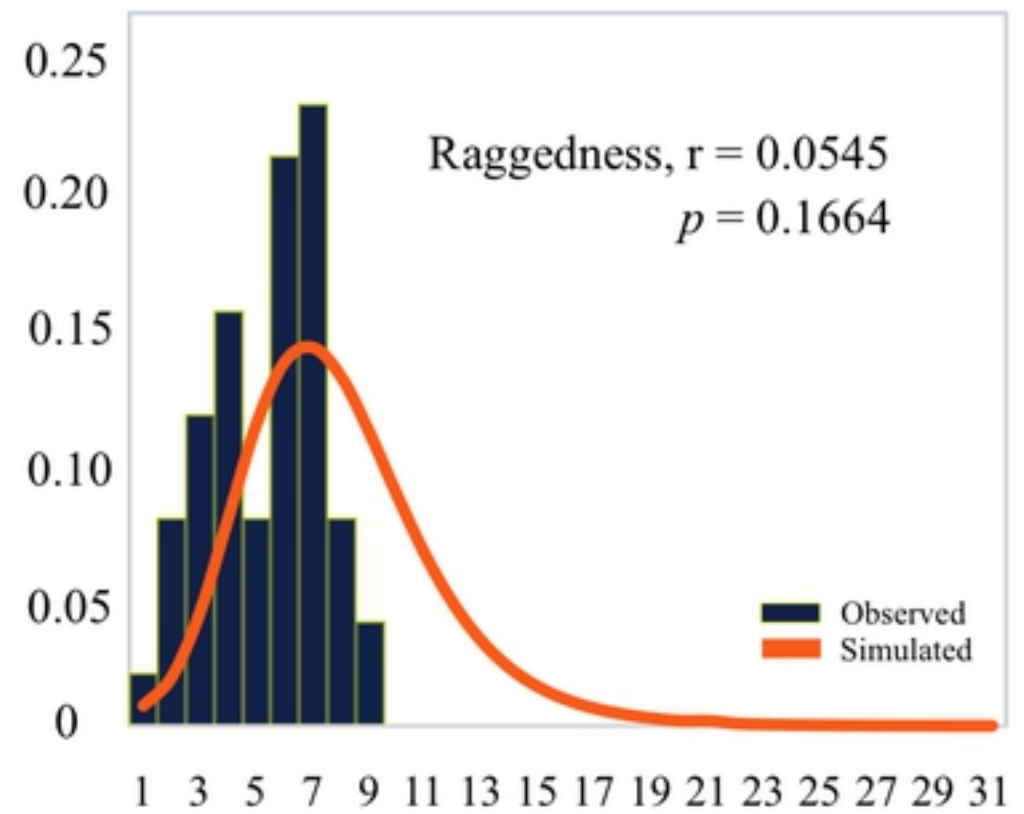

## Vietnam

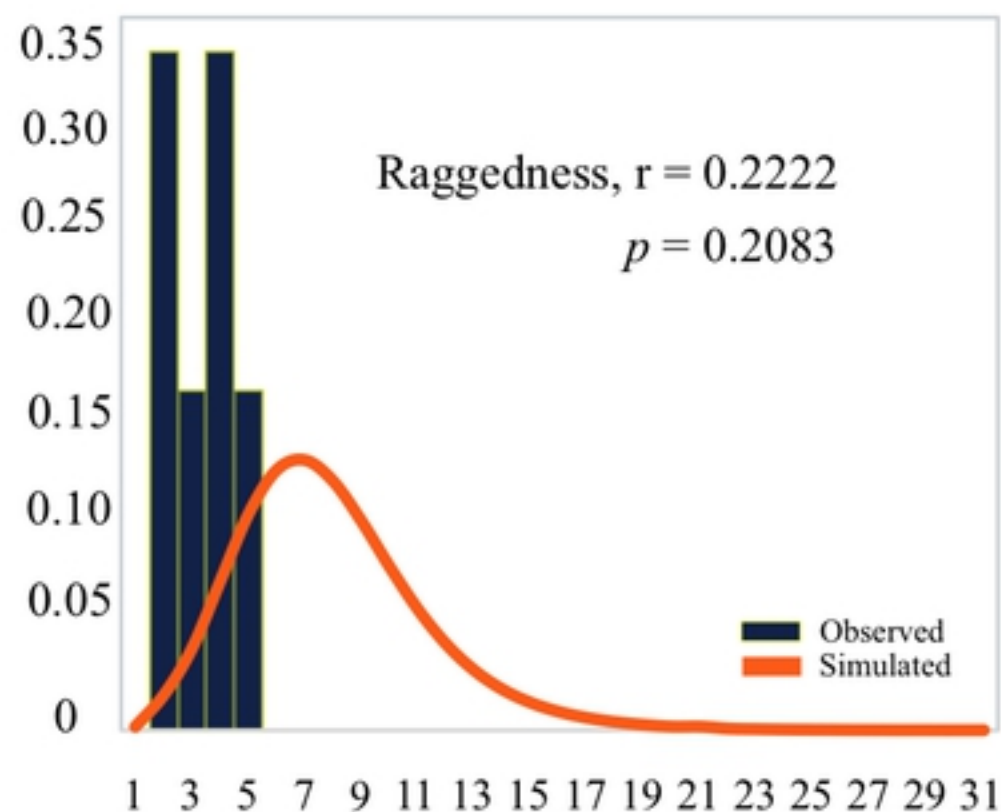

**(A)**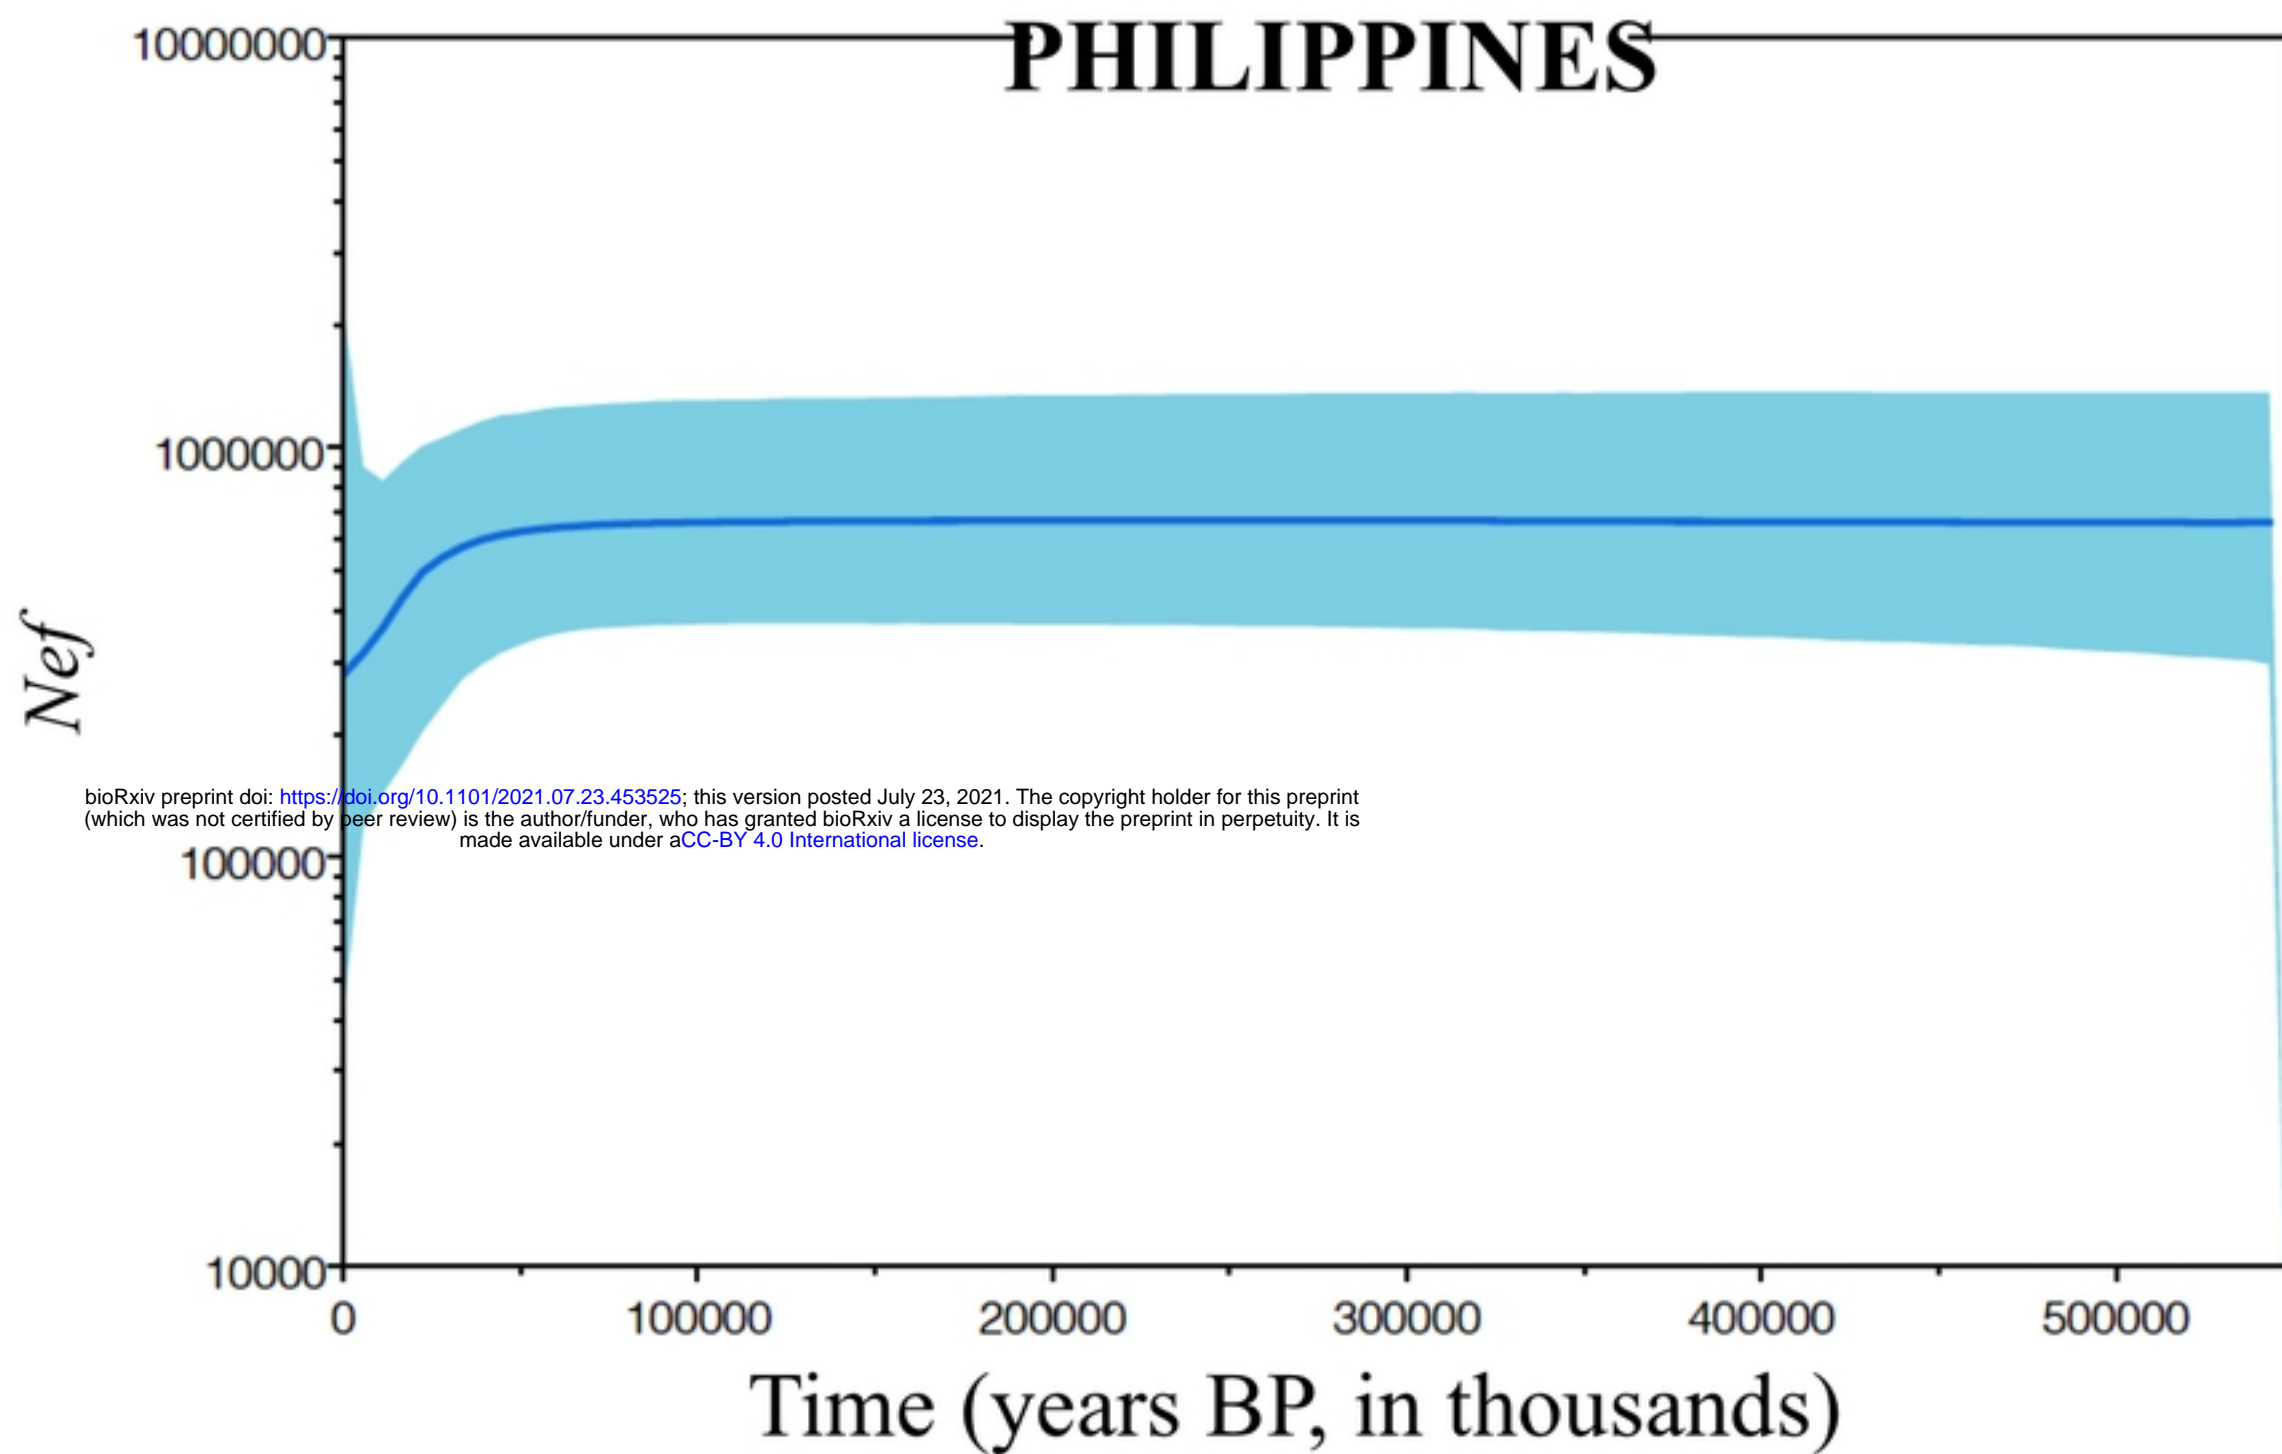**(B)**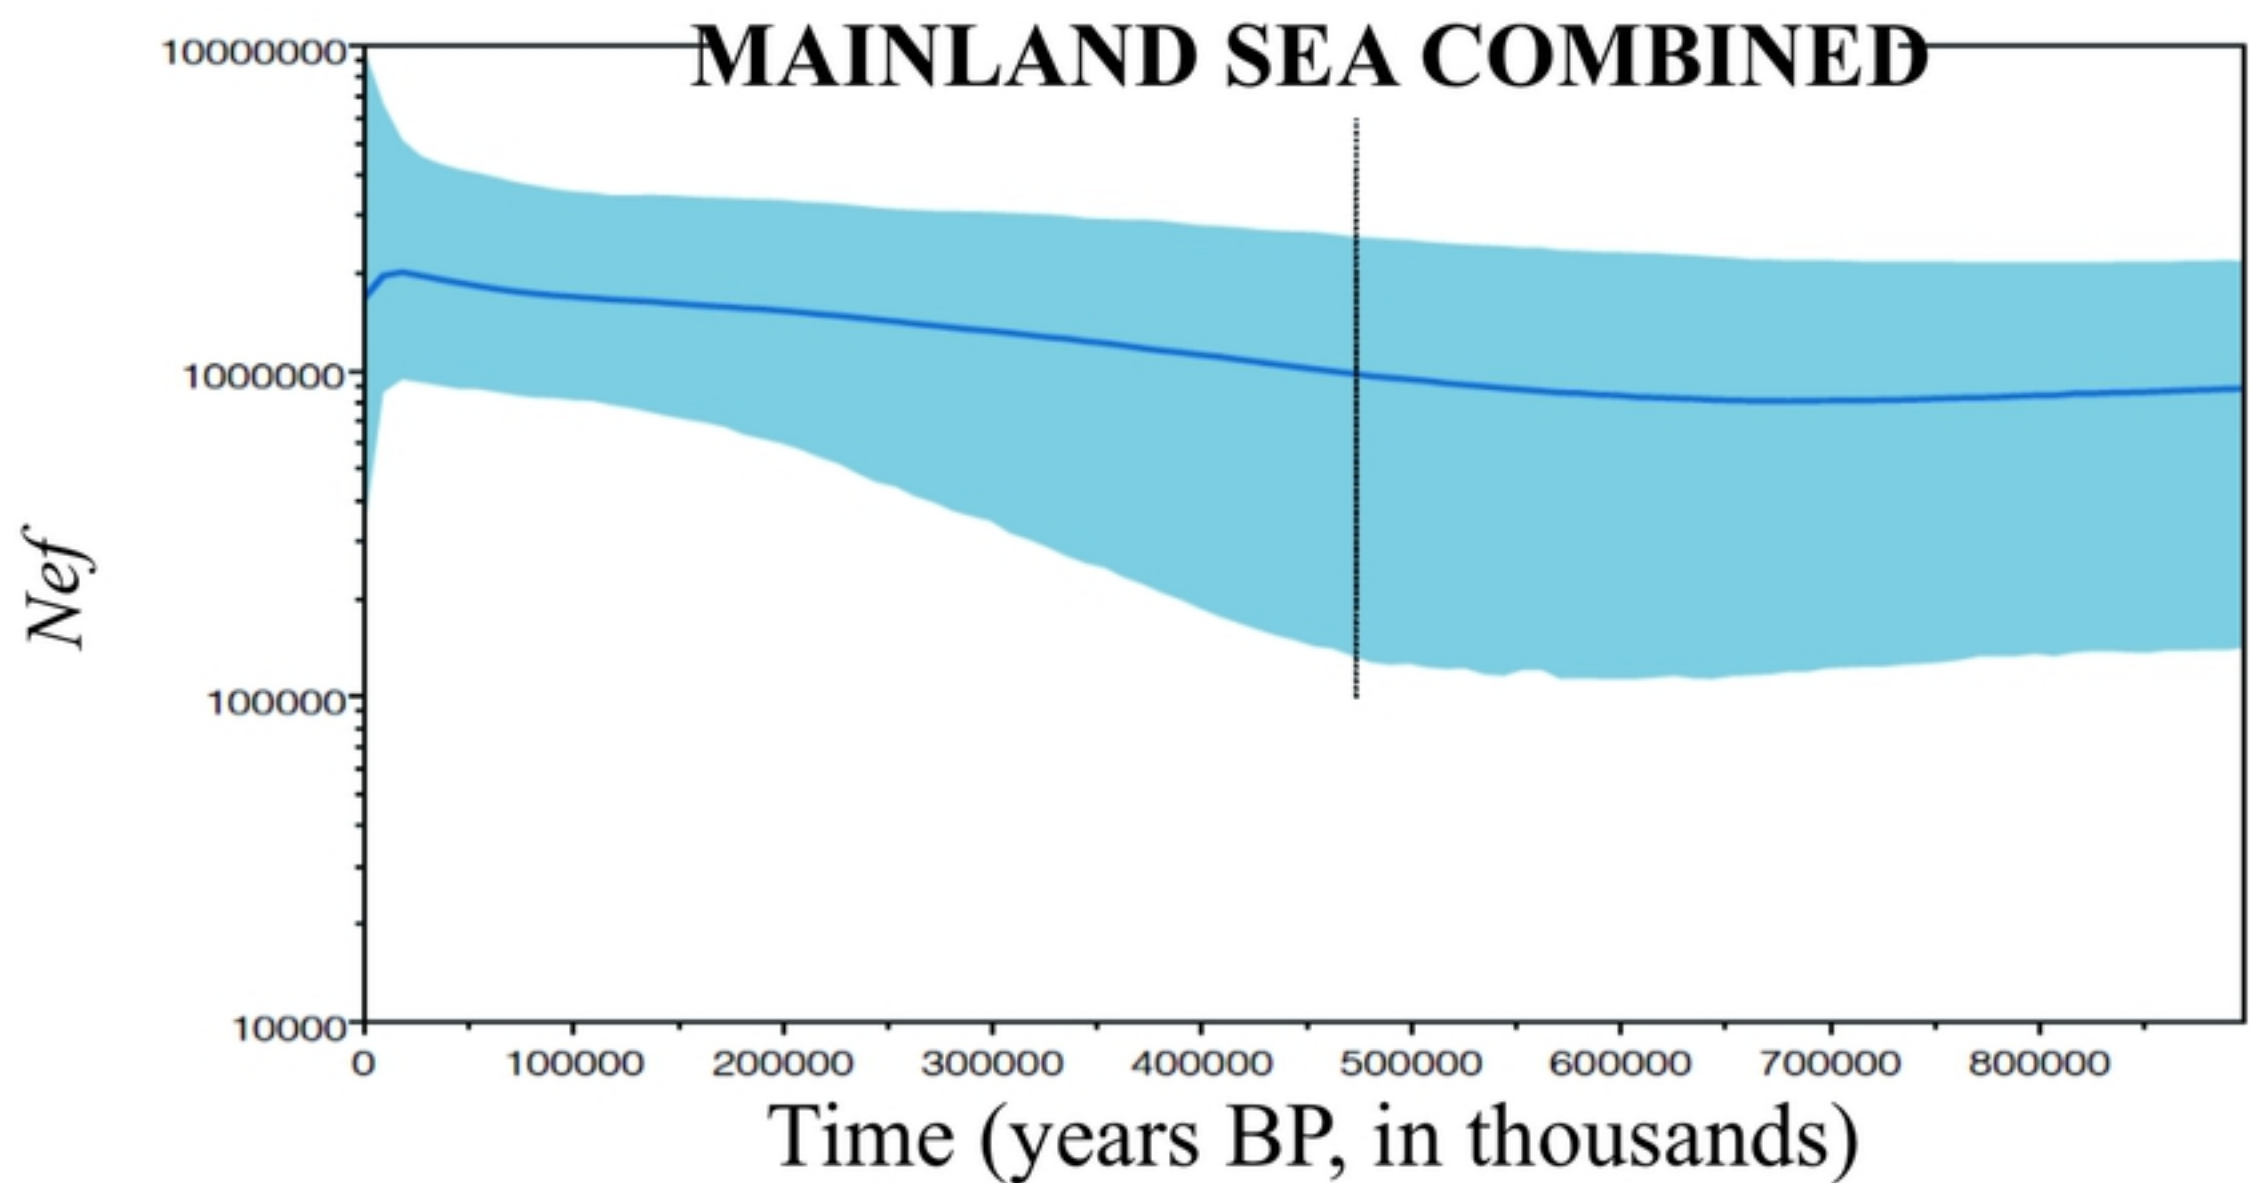

Figure
